# Supplementary material for: Effectiveness of Following Mediterranean Diet Recommendations in the Real World in the Incidence of Gestational Diabetes Mellitus (GDM) and Adverse Maternal-Foetal Outcomes: A Prospective, Universal, Interventional Study with a Single Group. The St Carlos Study
Source: PubMed Central journal article supplement (PMC6627921; doi:10.3390/nu11061210), 2019-05-28
Supplement: nutrients-11-01210-s001.pdf [file nutrients-11-01210-s001.pdf]

METADATA

```

GET
  FILE='C:\Users\acall\Desktop\Repositorio\DEIDENTIFIED_REALWORDL.sav'.
DATASET NAME Conjunto_de_datos1 WINDOW=FRONT.
USE ALL.
COMPUTE filter_$=(GDM_DIAGNOSIS = 2).
VARIABLE LABELS filter_$ 'GDM_DIAGNOSIS = 2 (FILTER)'.
VALUE LABELS filter_$ 0 'Not Selected' 1 'Selected'.
FORMATS filter_$ (f1.0).
FILTER BY filter_$.
EXECUTE.
FREQUENCIES VARIABLES=ETHNICITY
  /ORDER=ANALYSIS.
  
```

**ETHNICITY**

|         |                             | Frecuencia | Porcentaje | Porcentaje<br>válido | Porcentaje<br>acumulado |
|---------|-----------------------------|------------|------------|----------------------|-------------------------|
| Válidos | caucasica /incluye española | 574        | 61,6       | 61,6                 | 61,6                    |
|         | Eslava Rumania-Bulgaria...  | 48         | 5,2        | 5,2                  | 66,7                    |
|         | Hispanica                   | 284        | 30,5       | 30,5                 | 97,2                    |
|         | china                       | 9          | 1,0        | 1,0                  | 98,2                    |
|         | africana                    | 14         | 1,5        | 1,5                  | 99,7                    |
|         | otras                       | 3          | ,3         | ,3                   | 100,0                   |
|         | Total                       | 932        | 100,0      | 100,0                |                         |

**FAMILY HISTORY**

|          |               | Frecuencia | Porcentaje | Porcentaje<br>válido | Porcentaje<br>acumulado |
|----------|---------------|------------|------------|----------------------|-------------------------|
| Válidos  | no existen    | 246        | 26,4       | 26,4                 | 26,4                    |
|          | diabetes      | 45         | 4,8        | 4,8                  | 31,3                    |
|          | HTA           | 56         | 6,0        | 6,0                  | 37,3                    |
|          | dislipemia    | 84         | 9,0        | 9,0                  | 46,3                    |
|          | obesidad      | 108        | 11,6       | 11,6                 | 57,9                    |
|          | 2 situaciones | 215        | 23,1       | 23,1                 | 81,0                    |
|          | mas de 2      | 174        | 18,7       | 18,7                 | 99,7                    |
|          | 7             | 1          | ,1         | ,1                   | 99,8                    |
|          | desconocido   | 2          | ,2         | ,2                   | 100,0                   |
|          | Total         | 931        | 99,9       | 100,0                |                         |
| Perdidos | Sistema       | 1          | ,1         |                      |                         |
| Total    |               | 932        | 100,0      |                      |                         |

**GESTATIONAL\_HISTORY**

|         |              | Frecuencia | Porcentaje | Porcentaje<br>válido | Porcentaje<br>acumulado |
|---------|--------------|------------|------------|----------------------|-------------------------|
| Válidos | ninguno      | 551        | 59,1       | 59,1                 | 59,1                    |
|         | aborto       | 311        | 33,4       | 33,4                 | 92,5                    |
|         | GDM          | 26         | 2,8        | 2,8                  | 95,3                    |
|         | HTA          | 10         | 1,1        | 1,1                  | 96,4                    |
|         | OTROS        | 8          | ,9         | ,9                   | 97,2                    |
|         | GDM Y OTROS  | 1          | ,1         | ,1                   | 97,3                    |
|         | GDM Y aborto | 10         | 1,1        | 1,1                  | 98,4                    |
|         | desconocido  | 11         | 1,2        | 1,2                  | 99,6                    |
|         | HTA y aborto | 4          | ,4         | ,4                   | 100,0                   |
|         | Total        | 932        | 100,0      | 100,0                |                         |

#### EDUCATIONAL STATUS

|          |                          | Frecuencia | Porcentaje | Porcentaje<br>válido | Porcentaje<br>acumulado |
|----------|--------------------------|------------|------------|----------------------|-------------------------|
| Válidos  | SIN ESTUDIOS             | 1          | ,1         | ,1                   | ,1                      |
|          | PRIMARIOS                | 58         | 6,2        | 6,2                  | 6,3                     |
|          | BACHILLERATO             | 241        | 25,9       | 25,9                 | 32,2                    |
|          | FORMACION<br>PROFESIONAL | 145        | 15,6       | 15,6                 | 47,8                    |
|          | UNIVERSITARIO            | 476        | 51,1       | 51,1                 | 98,9                    |
|          | DESCONOCIDO              | 10         | 1,1        | 1,1                  | 100,0                   |
|          | Total                    | 931        | 99,9       | 100,0                |                         |
| Perdidos | Sistema                  | 1          | ,1         |                      |                         |
| Total    |                          | 932        | 100,0      |                      |                         |

#### EMPLOYMENT

|         |               | Frecuencia | Porcentaje | Porcentaje<br>válido | Porcentaje<br>acumulado |
|---------|---------------|------------|------------|----------------------|-------------------------|
| Válidos | ESTUDIANTE    | 19         | 2,0        | 2,0                  | 2,0                     |
|         | AMA DE CASA   | 17         | 1,8        | 1,8                  | 3,9                     |
|         | FUERA DE CASA | 743        | 79,7       | 79,7                 | 83,6                    |
|         | EN PARO       | 140        | 15,0       | 15,0                 | 98,6                    |
|         | 5             | 2          | ,2         | ,2                   | 98,8                    |
|         | DESCONOCIDO   | 11         | 1,2        | 1,2                  | 100,0                   |
|         | Total         | 932        | 100,0      | 100,0                |                         |

#### NºPREGNANCY

|          |         | Frecuencia | Porcentaje | Porcentaje<br>válido | Porcentaje<br>acumulado |
|----------|---------|------------|------------|----------------------|-------------------------|
| Válidos  | 1       | 394        | 42,3       | 42,6                 | 42,6                    |
|          | 2       | 276        | 29,6       | 29,8                 | 72,4                    |
|          | 3       | 171        | 18,3       | 18,5                 | 90,9                    |
|          | 4       | 52         | 5,6        | 5,6                  | 96,5                    |
|          | 5       | 23         | 2,5        | 2,5                  | 99,0                    |
|          | 6       | 7          | ,8         | ,8                   | 99,8                    |
|          | 7       | 2          | ,2         | ,2                   | 100,0                   |
|          | Total   | 925        | 99,2       | 100,0                |                         |
| Perdidos | Sistema | 7          | ,8         |                      |                         |
| Total    |         | 932        | 100,0      |                      |                         |

### SMOKE\_SITUATION

|         |                    | Frecuencia | Porcentaje | Porcentaje<br>válido | Porcentaje<br>acumulado |
|---------|--------------------|------------|------------|----------------------|-------------------------|
| Válidos | nunca              | 531        | 57,0       | 57,0                 | 57,0                    |
|         | hasta hace 6 meses | 205        | 22,0       | 22,0                 | 79,0                    |
|         | hasta embarazo     | 116        | 12,4       | 12,4                 | 91,4                    |
|         | fumo actualmente   | 77         | 8,3        | 8,3                  | 99,7                    |
|         | desconoce          | 3          | ,3         | ,3                   | 100,0                   |
|         | Total              | 932        | 100,0      | 100,0                |                         |

### Estadísticos descriptivos

|                                                                                         | N   | Media   | Desv. típ. |
|-----------------------------------------------------------------------------------------|-----|---------|------------|
| AGE                                                                                     | 932 | 32,41   | 5,173      |
| GESTATIONAL_AGE_AT_ENTRY                                                                | 922 | 12,05   | ,535       |
| kg                                                                                      | 918 | 59,5909 | 9,74866    |
| KG                                                                                      | 924 | 61,3706 | 9,95044    |
| COMPUTE<br>GananciaPesoSG12=PESO<br>_SG12 -<br>Pesopregestacional                       | 910 | 1,8183  | 3,36202    |
| COMPUTE<br>BMIPREGESTACIONAL=P<br>esopregestacional /<br>(TALLAmetros *<br>TALLAmetros) | 915 | 22,4678 | 3,45147    |
| COMPUTE<br>BMISG12=PESO_SG12/<br>(TALLAmetros *<br>TALLAmetros)                         | 770 | 23,3969 | 3,72425    |

|                                                                                                                                                                                                                                                                                                                     |     |        |         |
|---------------------------------------------------------------------------------------------------------------------------------------------------------------------------------------------------------------------------------------------------------------------------------------------------------------------|-----|--------|---------|
| SBP_12GW                                                                                                                                                                                                                                                                                                            | 918 | 108,20 | 10,153  |
| DBP_12GW                                                                                                                                                                                                                                                                                                            | 918 | 66,70  | 8,087   |
| MG/DL                                                                                                                                                                                                                                                                                                               | 768 | 80,25  | 6,142   |
| HbA1cSG12                                                                                                                                                                                                                                                                                                           | 55  | 5,115  | ,2422   |
| CHOLESTROL_12GW                                                                                                                                                                                                                                                                                                     | 459 | 169,34 | 31,976  |
| TRIGLICÉRIDOSSG12                                                                                                                                                                                                                                                                                                   | 450 | 78,75  | 34,367  |
| TSHSG12                                                                                                                                                                                                                                                                                                             | 806 | 2,1298 | 2,85730 |
| T4LSG12                                                                                                                                                                                                                                                                                                             | 777 | 8,7892 | 1,61639 |
| COMPUTE                                                                                                                                                                                                                                                                                                             | 744 | 4,3374 | 1,66523 |
| SG12_MEDDIET_SCORE=<br>SG12_ACEITEOLIVAMED<br>DIET +<br>SG12_MLACEITEDIA_MED<br>DIET +<br>SG12_VERDURAS_MEDDI<br>ET +<br>SG12_FRUTAS_MEDDIET<br>+<br>SG12_CARNEPROCESAD<br>A_MEDDIET +<br>SG12_MANTEQUILLA_ME<br>DDIET +<br>SG12_BEBIDASAZUCARA<br>DAS_MEDDIET +<br>SG12_ALCOHOL_MEDDIE<br>T +<br>SG12_LEGUMBRES_ME |     |        |         |
| PREG_NUTRITIONSCORE                                                                                                                                                                                                                                                                                                 | 793 | ,3884  | 3,05223 |
| N válido (según lista)                                                                                                                                                                                                                                                                                              | 43  |        |         |

GRUPO MUNDO REAL VS CONTROL ES SUPERIOR

RR 0.82 (0.72-0.92) P <0.001

#### Estimación de riesgo

|                                                                | Valor | Intervalo de confianza al 95% |          |
|----------------------------------------------------------------|-------|-------------------------------|----------|
|                                                                |       | Inferior                      | Superior |
| Razón de las ventajas para<br>DIABETESGESTACIONAL<br>(SI / NO) | 1,673 | 1,252                         | 2,235    |
| Para la cohorte<br>GRUPO_ALEATORIZADO<br>= CONTROL             | 1,374 | 1,161                         | 1,627    |

|                                                                 |             |             |             |
|-----------------------------------------------------------------|-------------|-------------|-------------|
| Para la cohorte                                                 | <b>,821</b> | <b>,727</b> | <b>,928</b> |
| GRUPO_ALEATORIZADO<br>= INTERVENCION SIN<br>ACEITE NI PISTACHOS |             |             |             |
| N de casos válidos                                              | 1275        |             |             |

**Pruebas de chi-cuadrado**

|                                         | Valor               | gl | Sig. asintótica<br>(bilateral) | Sig. exacta<br>(bilateral) | Sig. exacta<br>(unilateral) |
|-----------------------------------------|---------------------|----|--------------------------------|----------------------------|-----------------------------|
| Chi-cuadrado de Pearson                 | 12,266 <sup>a</sup> | 1  | ,000                           |                            |                             |
| Corrección por continuidad <sup>b</sup> | 11,737              | 1  | ,001                           |                            |                             |
| Razón de verosimilitudes                | 11,928              | 1  | ,001                           |                            |                             |
| Estadístico exacto de<br>Fisher         |                     |    |                                | <b>,001</b>                | ,000                        |
| Asociación lineal por lineal            | 12,256              | 1  | ,000                           |                            |                             |
| N de casos válidos                      | 1275                |    |                                |                            |                             |

a. 0 casillas (,0%) tienen una frecuencia esperada inferior a 5. La frecuencia mínima esperada es 80,06.

b. Calculado sólo para una tabla de 2x2.

MUNDO REAL VS GRUPO INTERVENCIÓN NO ES DIFERENTE AUNQUE MEJOR PERO SIN SS

**RR 0.96 (0.85-1.07) P =0.468**

**Estimación de riesgo**

|                                                                           | Valor       | Intervalo de confianza al 95% |              |
|---------------------------------------------------------------------------|-------------|-------------------------------|--------------|
|                                                                           |             | Inferior                      | Superior     |
| Razón de las ventajas para DIABETESGESTACIONAL (SI / NO)                  | 1,125       | ,823                          | 1,538        |
| Para la cohorte GRUPO_ALEATORIZADO = INTERVENCION ACEITE OLIVA            | 1,079       | ,884                          | 1,319        |
| Para la cohorte GRUPO_ALEATORIZADO = INTERVENCION SIN ACEITE NI PISTACHOS | <b>,960</b> | <b>,857</b>                   | <b>1,074</b> |
| N de casos válidos                                                        | 1269        |                               |              |

#### Pruebas de chi-cuadrado

|                                         | Valor             | gl | Sig. asintótica (bilateral) | Sig. exacta (bilateral) | Sig. exacta (unilateral) |
|-----------------------------------------|-------------------|----|-----------------------------|-------------------------|--------------------------|
| Chi-cuadrado de Pearson                 | ,545 <sup>a</sup> | 1  | ,460                        |                         |                          |
| Corrección por continuidad <sup>b</sup> | ,432              | 1  | ,511                        |                         |                          |
| Razón de verosimilitudes                | ,541              | 1  | ,462                        |                         |                          |
| Estadístico exacto de Fisher            |                   |    |                             | <b>,468</b>             | ,254                     |
| Asociación lineal por lineal            | ,545              | 1  | ,460                        |                         |                          |
| N de casos válidos                      | 1269              |    |                             |                         |                          |

a. 0 casillas (,0%) tienen una frecuencia esperada inferior a 5. La frecuencia mínima esperada es 69,43.

b. Calculado sólo para una tabla de 2x2.

**Estadísticos de grupo**

| GDM DIAGNOSIS      |    | N   | Media   | Desviación típ. | Error típ. de la media |
|--------------------|----|-----|---------|-----------------|------------------------|
| SOG 75 G           | SI | 130 | 92,35   | 8,636           | ,757                   |
|                    | NO | 802 | 82,90   | 4,883           | ,172                   |
| BG_60min_24GW      | SI | 76  | 164,07  | 33,547          | 3,848                  |
|                    | NO | 798 | 118,33  | 26,439          | ,936                   |
| BG120min_24GW      | SI | 76  | 137,57  | 31,588          | 3,623                  |
|                    | NO | 793 | 101,34  | 19,763          | ,702                   |
| SOG 75 G           | SI | 126 | 5,016   | ,3066           | ,0273                  |
|                    | NO | 790 | 4,865   | ,2659           | ,0095                  |
| COLESTEROL_SG24    | SI | 116 | 238,44  | 43,062          | 3,998                  |
|                    | NO | 700 | 243,12  | 41,571          | 1,571                  |
| TRIGLICÉRIDOS_SG24 | SI | 100 | 166,96  | 56,602          | 5,660                  |
|                    | NO | 606 | 155,12  | 52,152          | 2,119                  |
| INSULINA_SG24      | SI | 71  | 10,015  | 6,5471          | ,7770                  |
|                    | NO | 469 | 7,927   | 5,2783          | ,2437                  |
| HOMAIR_SG24        | SI | 69  | 2,337   | 1,5223          | ,1833                  |
|                    | NO | 447 | 1,908   | 2,7451          | ,1298                  |
| TSH_SG24           | SI | 115 | 1,8690  | 1,33069         | ,12409                 |
|                    | NO | 674 | 2,0031  | 1,02132         | ,03934                 |
| T4L_SG24           | SI | 113 | 6,9681  | 1,29481         | ,12181                 |
|                    | NO | 670 | 6,9682  | 1,14747         | ,04433                 |
| KILOGRAMOS         | SI | 124 | 66,3057 | 10,33743        | ,92833                 |
|                    | NO | 773 | 66,5423 | 9,96940         | ,35857                 |
| SBP_24GW           | SI | 121 | 106,43  | 11,036          | 1,003                  |
|                    | NO | 755 | 104,84  | 10,848          | ,395                   |
| DBP_24GW           | SI | 121 | 64,75   | 9,253           | ,841                   |
|                    | NO | 755 | 62,91   | 8,083           | ,294                   |
| KILOGRAMOS         | SI | 116 | 70,2517 | 11,30074        | 1,04925                |
|                    | NO | 594 | 71,3641 | 9,91473         | ,40681                 |
| SBP_36GW           | SI | 119 | 113,70  | 10,822          | ,992                   |
|                    | NO | 698 | 114,50  | 13,528          | ,512                   |
| DBP_36GW           | SI | 119 | 70,22   | 9,912           | ,909                   |
|                    | NO | 697 | 71,34   | 9,512           | ,360                   |

**Tabla de contingencia INSULINTREATEDGDM \* GDM\_DIAGNOSIS**

Recuento

|                   |      | GDM DIAGNOSIS |     | Total |
|-------------------|------|---------------|-----|-------|
|                   |      | SI            | NO  |       |
| INSULINTREATEDGDM | 1,00 | 30            | 0   | 30    |
|                   | 2,00 | 102           | 800 | 902   |
| Total             |      | 130           | 802 | 932   |

**Tabla de contingencia GDMTREATMENT \* GDM\_DIAGNOSIS**

Recuento

|              |                     | GDM DIAGNOSIS |    | Total |
|--------------|---------------------|---------------|----|-------|
|              |                     | SI            | NO |       |
| GDMTREATMENT | DIETA               | 100           | 0  | 100   |
|              | INSULINA BASAL      | 18            | 0  | 18    |
|              | INSULINA BOLO       | 5             | 0  | 5     |
|              | INCOMPLETA          |               |    |       |
|              | INSULINA BASAL+BOLO | 7             | 0  | 7     |
|              | INCOMPLETA          |               |    |       |
| Total        |                     | 130           | 0  | 130   |

**Tabla de contingencia IWG\_VS\_ADEQUATE \* GDM\_DIAGNOSIS**

Recuento

|                 |      | GDM DIAGNOSIS |     | Total |
|-----------------|------|---------------|-----|-------|
|                 |      | SI            | NO  |       |
| IWG_VS_ADEQUATE | ,00  | 35            | 135 | 170   |
|                 | 1,00 | 61            | 296 | 357   |
| Total           |      | 96            | 431 | 527   |

**Tabla de contingencia EWG\_VS\_ADEQUATE \* GDM\_DIAGNOSIS**

Recuento

|                 |      | GDM DIAGNOSIS |     | Total |
|-----------------|------|---------------|-----|-------|
|                 |      | SI            | NO  |       |
| EWG_VS_ADEQUATE | 1,00 | 61            | 296 | 357   |
|                 | 2,00 | 34            | 371 | 405   |
| Total           |      | 95            | 667 | 762   |



**Prueba de muestras independientes**

|                    |                                     | Prueba de Levene para la igualdad de varianzas |      | Prueba T para la igualdad de medias |         |                  |                      |                             |                                               |          |
|--------------------|-------------------------------------|------------------------------------------------|------|-------------------------------------|---------|------------------|----------------------|-----------------------------|-----------------------------------------------|----------|
|                    |                                     | F                                              | Sig. | t                                   | gl      | Sig. (bilateral) | Diferencia de medias | Error típ. de la diferencia | 95% Intervalo de confianza para la diferencia |          |
|                    |                                     |                                                |      |                                     |         |                  |                      |                             | Inferior                                      | Superior |
| SOG 75 G           | Se han asumido varianzas iguales    | 38,583                                         | ,000 | 17,993                              | 930     | ,000             | 9,454                | ,525                        | 8,423                                         | 10,483   |
|                    | No se han asumido varianzas iguales |                                                |      | 12,169                              | 142,652 | ,000             | 9,454                | ,777                        | 7,918                                         | 10,988   |
| BG_60min_24GW      | Se han asumido varianzas iguales    | 10,519                                         | ,001 | 14,046                              | 872     | ,000             | 45,736               | 3,256                       | 39,345                                        | 52,127   |
|                    | No se han asumido varianzas iguales |                                                |      | 11,549                              | 84,108  | ,000             | 45,736               | 3,960                       | 37,861                                        | 53,611   |
| BG120min_24GW      | Se han asumido varianzas iguales    | 44,151                                         | ,000 | 14,332                              | 867     | ,000             | 36,225               | 2,528                       | 31,264                                        | 41,186   |
|                    | No se han asumido varianzas iguales |                                                |      | 9,815                               | 80,722  | ,000             | 36,225               | 3,691                       | 28,882                                        | 43,568   |
| SOG 75 G           | Se han asumido varianzas iguales    | 3,398                                          | ,066 | 5,778                               | 914     | ,000             | ,1507                | ,0261                       | ,0995                                         | ,2019    |
|                    | No se han asumido varianzas iguales |                                                |      | 5,213                               | 156,443 | ,000             | ,1507                | ,0289                       | ,0936                                         | ,2074    |
| COLESTEROL_SG24    | Se han asumido varianzas iguales    | ,004                                           | ,952 | -1,117                              | 814     | ,264             | -4,679               | 4,189                       | -12,901                                       | 3,543    |
|                    | No se han asumido varianzas iguales |                                                |      | -1,089                              | 152,664 | ,278             | -4,679               | 4,296                       | -13,166                                       | 3,800    |
| TRIGLICÉRIDOS_SG24 | Se han asumido varianzas iguales    | 1,958                                          | ,162 | 2,077                               | 704     | ,038             | 11,835               | 5,699                       | ,646                                          | 23,024   |
|                    | No se han asumido varianzas iguales |                                                |      | 1,958                               | 128,269 | ,052             | 11,835               | 6,044                       | -,123                                         | 23,799   |
| INSULINA_SG24      | Se han asumido varianzas iguales    | 8,974                                          | ,003 | 3,003                               | 538     | ,003             | 2,0882               | ,6953                       | ,7223                                         | 3,454    |

|             |                                        |       |      |        |         |      |          |         |          |        |
|-------------|----------------------------------------|-------|------|--------|---------|------|----------|---------|----------|--------|
|             | No se han asumido<br>varianzas iguales |       |      | 2,564  | 84,331  | ,012 | 2,0882   | ,8143   | ,4689    | 3,707  |
| HOMAIR_SG24 | Se han asumido varianzas<br>iguales    | ,294  | ,588 | 1,269  | 514     | ,205 | ,4294    | ,3384   | -,2354   | 1,094  |
|             | No se han asumido<br>varianzas iguales |       |      | 1,912  | 147,715 | ,058 | ,4294    | ,2246   | -,0144   | ,873   |
| TSH_SG24    | Se han asumido varianzas<br>iguales    | ,271  | ,603 | -1,241 | 787     | ,215 | -,13419  | ,10812  | -,34644  | ,0780  |
|             | No se han asumido<br>varianzas iguales |       |      | -1,031 | 137,832 | ,304 | -,13419  | ,13017  | -,39159  | ,1232  |
| T4L_SG24    | Se han asumido varianzas<br>iguales    | 2,762 | ,097 | -,001  | 781     | ,999 | -,00008  | ,11896  | -,23360  | ,2334  |
|             | No se han asumido<br>varianzas iguales |       |      | -,001  | 143,215 | ,999 | -,00008  | ,12962  | -,25630  | ,2561  |
| KILOGRAMOS  | Se han asumido varianzas<br>iguales    | ,241  | ,624 | -,244  | 895     | ,807 | -,23665  | ,96939  | -2,13919 | 1,6658 |
|             | No se han asumido<br>varianzas iguales |       |      | -,238  | 161,866 | ,812 | -,23665  | ,99517  | -2,20185 | 1,7285 |
| SBP_24GW    | Se han asumido varianzas<br>iguales    | ,053  | ,819 | 1,494  | 874     | ,135 | 1,591    | 1,065   | -,499    | 3,68   |
|             | No se han asumido<br>varianzas iguales |       |      | 1,476  | 159,435 | ,142 | 1,591    | 1,078   | -,538    | 3,72   |
| DBP_24GW    | Se han asumido varianzas<br>iguales    | 2,743 | ,098 | 2,278  | 874     | ,023 | 1,841    | ,808    | ,254     | 3,42   |
|             | No se han asumido<br>varianzas iguales |       |      | 2,066  | 150,789 | ,041 | 1,841    | ,891    | ,080     | 3,60   |
| KILOGRAMOS  | Se han asumido varianzas<br>iguales    | ,293  | ,589 | -1,079 | 708     | ,281 | -1,11238 | 1,03060 | -3,13578 | ,9110  |
|             | No se han asumido<br>varianzas iguales |       |      | -,988  | 151,508 | ,324 | -1,11238 | 1,12535 | -3,33579 | 1,1110 |
| SBP_36GW    | Se han asumido varianzas<br>iguales    | 5,557 | ,019 | -,618  | 815     | ,537 | -,807    | 1,306   | -3,371   | 1,75   |
|             | No se han asumido<br>varianzas iguales |       |      | -,723  | 187,006 | ,471 | -,807    | 1,116   | -3,009   | 1,39   |

|          |                                     |      |      |        |         |      |        |      |        |     |
|----------|-------------------------------------|------|------|--------|---------|------|--------|------|--------|-----|
| DBP_36GW | Se han asumido varianzas iguales    | ,193 | ,661 | -1,178 | 814     | ,239 | -1,119 | ,949 | -2,982 | ,74 |
|          | No se han asumido varianzas iguales |      |      | -1,145 | 157,364 | ,254 | -1,119 | ,977 | -3,049 | ,81 |

**Estadísticos de grupo**

| GDM DIAGNOSIS                 |    | N   | Media   | Desviación típ. | Error típ. de la media |
|-------------------------------|----|-----|---------|-----------------|------------------------|
| COMPUTE                       | SI | 130 | 2,1285  | 4,70636         | ,41277                 |
| GananciaPesoSG12=PESO         | NO | 780 | 1,7666  | 3,08266         | ,11038                 |
| _SG12 -<br>Pesopregestacional |    |     |         |                 |                        |
| COMPUTE                       | SI | 124 | 7,1258  | 4,90861         | ,44081                 |
| GananciaPesoSG24=PESO         | NO | 759 | 7,0208  | 4,27066         | ,15502                 |
| _SG24 -<br>Pesopregestacional |    |     |         |                 |                        |
| COMPUTE                       | SI | 116 | 10,8828 | 6,46403         | ,60017                 |
| GananciaPesoSG38=PESO         | NO | 582 | 12,2990 | 5,42342         | ,22481                 |
| _SG36 -<br>Pesopregestacional |    |     |         |                 |                        |
| NUTRITION_SCORE_24G           | SI | 106 | 2,7642  | 3,46012         | ,33608                 |
| W                             | NO | 716 | 2,3521  | 3,49342         | ,13056                 |
| NUTRITION_SCORE_36G           | SI | 67  | 7,6119  | 3,20962         | ,39212                 |
| W                             | NO | 367 | 3,1580  | 3,45416         | ,18031                 |
| COMPUTE                       | SI | 68  | 5,4412  | 1,57766         | ,19132                 |

|                                      |           |               |                |               |
|--------------------------------------|-----------|---------------|----------------|---------------|
| SG24_MEDDIET_SCORE= NO               | 491       | 5,2301        | 1,77108        | ,07993        |
| SG24_ACEITEOLIVAMEDD<br>IET +        |           |               |                |               |
| SG24_MLACEITEDIA_MED<br>DIET +       |           |               |                |               |
| SG24_VERDURAS_MEDDI<br>ET +          |           |               |                |               |
| SG24_FRUTAS_MEDDIET<br>+             |           |               |                |               |
| SG24_CARNEPROCESAD<br>A_MEDDIET +    |           |               |                |               |
| SG24_MANTEQUILLA_ME<br>DDIET +       |           |               |                |               |
| SG24_BEBIDASAZUCARA<br>DAS_MEDDIET + |           |               |                |               |
| SG24_ALCOHOL_MEDDIE<br>T +           |           |               |                |               |
| SG24_LEGUMBRES_ME                    |           |               |                |               |
| <b>COMPUTE</b> SI                    | <b>37</b> | <b>7,6486</b> | <b>2,22631</b> | <b>,36600</b> |

|                                      |     |        |         |        |
|--------------------------------------|-----|--------|---------|--------|
| SG36_MEDDIET_SCORE= NO               | 212 | 5,4104 | 1,78633 | ,12269 |
| SG36_ACEITEOLIVAMEDD<br>IET +        |     |        |         |        |
| SG36_MLACEITEDIA_MED<br>DIET +       |     |        |         |        |
| SG36_VERDURAS_MEDDI<br>ET +          |     |        |         |        |
| SG36_FRUTAS_MEDDIET<br>+             |     |        |         |        |
| SG36_CARNEPROCESAD<br>A_MEDDIET +    |     |        |         |        |
| SG36_MANTEQUILLA_ME<br>DDIET +       |     |        |         |        |
| SG36_BEBIDASAZUCARA<br>DAS_MEDDIET + |     |        |         |        |
| SG36_ALCOHOL_MEDDIE<br>T +           |     |        |         |        |
| SG36_LEGUMBRES_ME                    |     |        |         |        |

**Prueba de muestras independientes**

|                                          |                                                 | Prueba de Levene para la igualdad de varianzas |      | Prueba T para la igualdad de medias |         |                  |                      |                             |                                               |          |
|------------------------------------------|-------------------------------------------------|------------------------------------------------|------|-------------------------------------|---------|------------------|----------------------|-----------------------------|-----------------------------------------------|----------|
|                                          |                                                 | F                                              | Sig. | t                                   | gl      | Sig. (bilateral) | Diferencia de medias | Error típ. de la diferencia | 95% Intervalo de confianza para la diferencia |          |
|                                          |                                                 |                                                |      |                                     |         |                  |                      |                             | Inferior                                      | Superior |
| COMPUTE Se han asumido varianzas iguales | GananciaPesoSG12=PESO_SG12 - Pesopregestacional | 1,001                                          | ,317 | 1,136                               | 908     | ,256             | ,36186               | ,31844                      | -,26311                                       | ,986     |
| COMPUTE Se han asumido varianzas iguales | GananciaPesoSG24=PESO_SG24 - Pesopregestacional | ,008                                           | ,927 | ,248                                | 881     | ,804             | ,10506               | ,42283                      | -,72481                                       | ,934     |
|                                          |                                                 |                                                |      | ,847                                | 147,982 | ,398             | ,36186               | ,42728                      | -,48249                                       | 1,206    |
|                                          |                                                 |                                                |      | ,225                                | 154,919 | ,822             | ,10506               | ,46727                      | -,81798                                       | 1,028    |



|                      |                   |  |  |       |        |      |         |        |         |       |
|----------------------|-------------------|--|--|-------|--------|------|---------|--------|---------|-------|
| SG36_ACEITEOLIVAMEDD | No se han asumido |  |  | 5,798 | 44,449 | ,000 | 2,23827 | ,38602 | 1,46052 | 3,016 |
| IET +                | varianzas iguales |  |  |       |        |      |         |        |         |       |
| SG36_MLACEITEDIA_MED |                   |  |  |       |        |      |         |        |         |       |
| DIET +               |                   |  |  |       |        |      |         |        |         |       |
| SG36_VERDURAS_MEDDI  |                   |  |  |       |        |      |         |        |         |       |
| ET +                 |                   |  |  |       |        |      |         |        |         |       |
| SG36_FRUTAS_MEDDIET  |                   |  |  |       |        |      |         |        |         |       |
| +                    |                   |  |  |       |        |      |         |        |         |       |
| SG36_CARNEPROCESAD   |                   |  |  |       |        |      |         |        |         |       |
| A_MEDDIET +          |                   |  |  |       |        |      |         |        |         |       |
| SG36_MANTEQUILLA_ME  |                   |  |  |       |        |      |         |        |         |       |
| DDIET +              |                   |  |  |       |        |      |         |        |         |       |
| SG36_BEBIDASAZUCARA  |                   |  |  |       |        |      |         |        |         |       |
| DAS_MEDDIET +        |                   |  |  |       |        |      |         |        |         |       |
| SG36_ALCOHOL_MEDDIE  |                   |  |  |       |        |      |         |        |         |       |
| T +                  |                   |  |  |       |        |      |         |        |         |       |
| SG36_LEGUMBRES_ME    |                   |  |  |       |        |      |         |        |         |       |

### Estadísticos de grupo

| GDM DIAGNOSIS     |    | N   | Media     | Desviación típ. | Error típ. de la media |
|-------------------|----|-----|-----------|-----------------|------------------------|
| GW_AT_DELIVERY    | SI | 123 | 39,4614   | 1,68391         | ,15183                 |
|                   | NO | 734 | 39,5799   | 1,44956         | ,05350                 |
| Peso RN en gramos | SI | 114 | 3126,3333 | 465,05159       | 43,55607               |
|                   | NO | 697 | 3273,0344 | 468,27065       | 17,73702               |
| PERCENTIL_BW      | SI | 114 | 41,78     | 28,274          | 2,648                  |
|                   | NO | 691 | 49,64     | 27,825          | 1,059                  |
| LENGTH_cm         | SI | 67  | 49,0597   | 1,93360         | ,23623                 |
|                   | NO | 486 | 49,4105   | 2,13119         | ,09667                 |
| PERCENTIL_TALLA   | SI | 67  | 38,72     | 26,838          | 3,279                  |
|                   | NO | 486 | 42,71     | 27,432          | 1,244                  |
| PHCORD_BLOOD      | SI | 107 | 7,2668    | ,08470          | ,00819                 |
|                   | NO | 672 | 7,2779    | ,13352          | ,00515                 |

|            |    |     |      |      |      |
|------------|----|-----|------|------|------|
| APGAR_1MIN | SI | 107 | 8,79 | ,762 | ,074 |
|            | NO | 695 | 8,78 | ,958 | ,036 |
| APGAR_5MIN | SI | 107 | 9,90 | ,305 | ,029 |
|            | NO | 697 | 9,81 | ,658 | ,025 |

**Prueba de muestras independientes**

|                   |                                     | Prueba de Levene para la igualdad de varianzas |      | Prueba T para la igualdad de medias |         |                  |                      |                             |                                               |           |
|-------------------|-------------------------------------|------------------------------------------------|------|-------------------------------------|---------|------------------|----------------------|-----------------------------|-----------------------------------------------|-----------|
|                   |                                     | F                                              | Sig. | t                                   | gl      | Sig. (bilateral) | Diferencia de medias | Error típ. de la diferencia | 95% Intervalo de confianza para la diferencia |           |
|                   |                                     |                                                |      |                                     |         |                  |                      |                             | Inferior                                      | Superior  |
| GW_AT_DELIVERY    | Se han asumido varianzas iguales    | 1,678                                          | ,196 | -819                                | 855     | ,413             | -,11854              | ,14471                      | -,40256                                       | ,16549    |
|                   | No se han asumido varianzas iguales |                                                |      | -,736                               | 153,786 | ,463             | -,11854              | ,16098                      | -,43656                                       | ,19949    |
| Peso RN en gramos | Se han asumido varianzas iguales    | ,098                                           | ,754 | -3,104                              | 809     | ,002             | -146,70110           | 47,26314                    | -239,47395                                    | -53,92825 |
|                   | No se han asumido varianzas iguales |                                                |      | -3,119                              | 152,902 | ,002             | -146,70110           | 47,02907                    | -239,61174                                    | -53,79046 |
| PERCENTIL_BW      | Se han asumido varianzas iguales    | ,724                                           | ,395 | -2,787                              | 803     | ,005             | -7,856               | 2,819                       | -13,390                                       | -2,322    |
|                   | No se han asumido varianzas iguales |                                                |      | -2,755                              | 151,364 | ,007             | -7,856               | 2,852                       | -13,491                                       | -2,222    |
| LENGTH_cm         | Se han asumido varianzas iguales    | ,057                                           | ,811 | -1,277                              | 551     | ,202             | -,35079              | ,27478                      | -,89053                                       | ,18895    |
|                   | No se han asumido varianzas iguales |                                                |      | -1,374                              | 89,616  | ,173             | -,35079              | ,25524                      | -,85791                                       | ,15632    |
| PERCENTIL_TALLA   | Se han asumido varianzas iguales    | ,026                                           | ,872 | -1,120                              | 551     | ,263             | -3,993               | 3,566                       | -10,998                                       | 3,011     |
|                   | No se han asumido varianzas iguales |                                                |      | -1,139                              | 86,138  | ,258             | -3,993               | 3,507                       | -10,965                                       | 2,978     |
| PHCORD_BLOOD      | Se han asumido varianzas iguales    | ,000                                           | ,983 | -,833                               | 777     | ,405             | -,01109              | ,01332                      | -,03724                                       | ,01505    |



|            |                                     |       |      |        |         |      |         |        |         |        |
|------------|-------------------------------------|-------|------|--------|---------|------|---------|--------|---------|--------|
|            | No se han asumido varianzas iguales |       |      | -1,147 | 201,491 | ,253 | -,01109 | ,00967 | -,03017 | ,00798 |
| APGAR_1MIN | Se han asumido varianzas iguales    | 1,383 | ,240 | ,194   | 800     | ,846 | ,019    | ,097   | -,172   | ,209   |
|            | No se han asumido varianzas iguales |       |      | ,230   | 162,473 | ,819 | ,019    | ,082   | -,143   | ,181   |
| APGAR_5MIN | Se han asumido varianzas iguales    | 6,040 | ,014 | 1,293  | 802     | ,196 | ,084    | ,065   | -,043   | ,211   |
|            | No se han asumido varianzas iguales |       |      | 2,167  | 289,209 | ,031 | ,084    | ,039   | ,008    | ,160   |

**Tabla de contingencia**

|                 |      | GDM_DIAGNOSIS             |        | Total  |        |
|-----------------|------|---------------------------|--------|--------|--------|
|                 |      | SI                        | NO     |        |        |
| IWG_VS_ADEQUATE | ,00  | Recuento                  | 35     | 135    | 170    |
|                 |      | % dentro de GDM_DIAGNOSIS | 36,5%  | 31,3%  | 32,3%  |
|                 | 1,00 | Recuento                  | 61     | 296    | 357    |
|                 |      | % dentro de GDM_DIAGNOSIS | 63,5%  | 68,7%  | 67,7%  |
| Total           |      | Recuento                  | 96     | 431    | 527    |
|                 |      | % dentro de GDM_DIAGNOSIS | 100,0% | 100,0% | 100,0% |

**Pruebas de chi-cuadrado**

|                                         | Valor             | gl | Sig. asintótica (bilateral) | Sig. exacta (bilateral) | Sig. exacta (unilateral) |
|-----------------------------------------|-------------------|----|-----------------------------|-------------------------|--------------------------|
| Chi-cuadrado de Pearson                 | ,948 <sup>a</sup> | 1  | ,330                        |                         |                          |
| Corrección por continuidad <sup>b</sup> | ,727              | 1  | ,394                        |                         |                          |
| Razón de verosimilitudes                | ,932              | 1  | ,334                        |                         |                          |
| Estadístico exacto de Fisher            |                   |    |                             | ,336                    | ,196                     |

|                              |      |   |      |  |  |
|------------------------------|------|---|------|--|--|
| Asociación lineal por lineal | ,946 | 1 | ,331 |  |  |
| N de casos válidos           | 527  |   |      |  |  |

a. 0 casillas (,0%) tienen una frecuencia esperada inferior a 5. La frecuencia mínima esperada es 30,97.

b. Calculado sólo para una tabla de 2x2.

#### Estimación de riesgo

|                                                         | Valor | Intervalo de confianza al 95% |          |
|---------------------------------------------------------|-------|-------------------------------|----------|
|                                                         |       | Inferior                      | Superior |
| Razón de las ventajas para IWG_VS_ADEQUATE (,00 / 1,00) | 1,258 | ,792                          | 1,998    |
| Para la cohorte GDM_DIAGNOSIS = SI                      | 1,205 | ,830                          | 1,750    |
| Para la cohorte GDM_DIAGNOSIS = NO                      | ,958  | ,875                          | 1,048    |
| N de casos válidos                                      | 527   |                               |          |

#### Tabla de contingencia

|                 |      |                           | GDM DIAGNOSIS |        | Total  |
|-----------------|------|---------------------------|---------------|--------|--------|
|                 |      |                           | SI            | NO     |        |
| EWG_VS_ADEQUATE | 1,00 | Recuento                  | 61            | 296    | 357    |
|                 |      | % dentro de GDM_DIAGNOSIS | 64,2%         | 44,4%  | 46,9%  |
|                 | 2,00 | Recuento                  | 34            | 371    | 405    |
|                 |      | % dentro de GDM_DIAGNOSIS | 35,8%         | 55,6%  | 53,1%  |
| Total           |      | Recuento                  | 95            | 667    | 762    |
|                 |      | % dentro de GDM_DIAGNOSIS | 100,0%        | 100,0% | 100,0% |

**Pruebas de chi-cuadrado**

|                                         | Valor               | gl | Sig. asintótica<br>(bilateral) | Sig. exacta<br>(bilateral) | Sig. exacta<br>(unilateral) |
|-----------------------------------------|---------------------|----|--------------------------------|----------------------------|-----------------------------|
| Chi-cuadrado de Pearson                 | 13,135 <sup>a</sup> | 1  | ,000                           |                            |                             |
| Corrección por continuidad <sup>b</sup> | 12,351              | 1  | ,000                           |                            |                             |
| Razón de verosimilitudes                | 13,206              | 1  | ,000                           |                            |                             |
| Estadístico exacto de Fisher            |                     |    |                                | ,000                       | ,000                        |
| Asociación lineal por lineal            | 13,118              | 1  | ,000                           |                            |                             |
| N de casos válidos                      | 762                 |    |                                |                            |                             |

a. 0 casillas (,0%) tienen una frecuencia esperada inferior a 5. La frecuencia mínima esperada es 44,51.

b. Calculado sólo para una tabla de 2x2.

**Estimación de riesgo**

|                                                                | Valor | Intervalo de confianza al 95% |          |
|----------------------------------------------------------------|-------|-------------------------------|----------|
|                                                                |       | Inferior                      | Superior |
| Razón de las ventajas para<br>EWG_VS_ADEQUATE<br>(1,00 / 2,00) | 2,249 | 1,439                         | 3,514    |
| Para la cohorte<br>GDM_DIAGNOSIS = SI                          | 2,035 | 1,372                         | 3,020    |
| Para la cohorte<br>GDM_DIAGNOSIS = NO                          | ,905  | ,856                          | ,957     |
| N de casos válidos                                             | 762   |                               |          |

**Tabla de contingencia**

|                     |             | GDM_DIAGNOSIS                |      | Total |      |
|---------------------|-------------|------------------------------|------|-------|------|
|                     |             | SI                           | NO   |       |      |
| PREGNACY_INDUCED_HY | GESTACIONAL | Recuento                     | 3    | 15    | 18   |
| PERTENSION          |             | % dentro de<br>GDM_DIAGNOSIS | 2,3% | 1,9%  | 1,9% |

|                |                              |        |        |        |
|----------------|------------------------------|--------|--------|--------|
| PREGESTACIONAL | Recuento                     | 127    | 787    | 914    |
|                | % dentro de<br>GDM_DIAGNOSIS | 97,7%  | 98,1%  | 98,1%  |
| Total          | Recuento                     | 130    | 802    | 932    |
|                | % dentro de<br>GDM_DIAGNOSIS | 100,0% | 100,0% | 100,0% |

#### Pruebas de chi-cuadrado

|                                         | Valor             | gl | Sig. asintótica<br>(bilateral) | Sig. exacta<br>(bilateral) | Sig. exacta<br>(unilateral) |
|-----------------------------------------|-------------------|----|--------------------------------|----------------------------|-----------------------------|
| Chi-cuadrado de Pearson                 | ,113 <sup>a</sup> | 1  | ,737                           |                            |                             |
| Corrección por continuidad <sup>b</sup> | ,000              | 1  | 1,000                          |                            |                             |
| Razón de verosimilitudes                | ,107              | 1  | ,743                           |                            |                             |
| Estadístico exacto de Fisher            |                   |    |                                | ,729                       | ,470                        |
| Asociación lineal por lineal            | ,113              | 1  | ,737                           |                            |                             |
| N de casos válidos                      | 932               |    |                                |                            |                             |

a. 1 casillas (25,0%) tienen una frecuencia esperada inferior a 5. La frecuencia mínima esperada es 2,51.

b. Calculado sólo para una tabla de 2x2.

#### Estimación de riesgo

|                                                                                                      | Valor | Intervalo de confianza al 95% |          |
|------------------------------------------------------------------------------------------------------|-------|-------------------------------|----------|
|                                                                                                      |       | Inferior                      | Superior |
| Razón de las ventajas para<br>PREGNACY_INDUCED_H<br>YPERTENSION<br>(GESTACIONAL /<br>PREGESTACIONAL) | 1,239 | ,354                          | 4,342    |
| Para la cohorte<br>GDM_DIAGNOSIS = SI                                                                | 1,199 | ,422                          | 3,412    |
| Para la cohorte<br>GDM_DIAGNOSIS = NO                                                                | ,968  | ,786                          | 1,192    |

**Estimación de riesgo**

|                                                                                                      | Valor | Intervalo de confianza al 95% |          |
|------------------------------------------------------------------------------------------------------|-------|-------------------------------|----------|
|                                                                                                      |       | Inferior                      | Superior |
| Razón de las ventajas para<br>PREGNACY_INDUCED_H<br>YPERTENSION<br>(GESTACIONAL /<br>PREGESTACIONAL) | 1,239 | ,354                          | 4,342    |
| Para la cohorte<br>GDM_DIAGNOSIS = SI                                                                | 1,199 | ,422                          | 3,412    |
| Para la cohorte<br>GDM_DIAGNOSIS = NO                                                                | ,968  | ,786                          | 1,192    |
| N de casos válidos                                                                                   | 932   |                               |          |

**Tabla de contingencia**

|                           |    |                              | GDM_DIAGNOSIS |        | Total  |
|---------------------------|----|------------------------------|---------------|--------|--------|
|                           |    |                              | SI            | NO     |        |
| PRECLAMPSIA_ECLAMPS<br>IA | SI | Recuento                     | 1             | 9      | 10     |
|                           |    | % dentro de<br>GDM_DIAGNOSIS | ,8%           | 1,1%   | 1,1%   |
|                           | NO | Recuento                     | 129           | 793    | 922    |
|                           |    | % dentro de<br>GDM_DIAGNOSIS | 99,2%         | 98,9%  | 98,9%  |
| Total                     |    | Recuento                     | 130           | 802    | 932    |
|                           |    | % dentro de<br>GDM_DIAGNOSIS | 100,0%        | 100,0% | 100,0% |
|                           |    |                              |               |        |        |

**Pruebas de chi-cuadrado**

|  | Valor | gl | Sig. asintótica<br>(bilateral) | Sig. exacta<br>(bilateral) | Sig. exacta<br>(unilateral) |
|--|-------|----|--------------------------------|----------------------------|-----------------------------|
|  |       |    |                                |                            |                             |

|                                         |                   |   |       |       |      |
|-----------------------------------------|-------------------|---|-------|-------|------|
| Chi-cuadrado de Pearson                 | ,131 <sup>a</sup> | 1 | ,717  |       |      |
| Corrección por continuidad <sup>b</sup> | ,000              | 1 | 1,000 |       |      |
| Razón de verosimilitudes                | ,143              | 1 | ,705  |       |      |
| Estadístico exacto de Fisher            |                   |   |       | 1,000 | ,583 |
| Asociación lineal por lineal            | ,131              | 1 | ,717  |       |      |
| N de casos válidos                      | 932               |   |       |       |      |

a. 1 casillas (25,0%) tienen una frecuencia esperada inferior a 5. La frecuencia mínima esperada es 1,39.

b. Calculado sólo para una tabla de 2x2.

#### Estimación de riesgo

|                                                                   | Valor | Intervalo de confianza al 95% |          |
|-------------------------------------------------------------------|-------|-------------------------------|----------|
|                                                                   |       | Inferior                      | Superior |
| Razón de las ventajas para<br>PRECLAMPSIA_ECLAMPS<br>IA (SI / NO) | ,683  | ,086                          | 5,436    |
| Para la cohorte<br>GDM_DIAGNOSIS = SI                             | ,715  | ,111                          | 4,620    |
| Para la cohorte<br>GDM_DIAGNOSIS = NO                             | 1,046 | ,850                          | 1,289    |
| N de casos válidos                                                | 932   |                               |          |

#### Tabla de contingencia

|             |    |                              | GDM_DIAGNOSIS |       | Total |
|-------------|----|------------------------------|---------------|-------|-------|
|             |    |                              | SI            | NO    |       |
| PROTEINURIA | SI | Recuento                     | 2             | 4     | 6     |
|             |    | % dentro de<br>GDM_DIAGNOSIS | 1,5%          | ,5%   | ,6%   |
|             | NO | Recuento                     | 128           | 798   | 926   |
|             |    | % dentro de<br>GDM_DIAGNOSIS | 98,5%         | 99,5% | 99,4% |
| Total       |    | Recuento                     | 130           | 802   | 932   |

**Tabla de contingencia**

|             |    |                           | GDM DIAGNOSIS |        | Total  |
|-------------|----|---------------------------|---------------|--------|--------|
|             |    |                           | SI            | NO     |        |
| PROTEINURIA | SI | Recuento                  | 2             | 4      | 6      |
|             |    | % dentro de GDM DIAGNOSIS | 1,5%          | ,5%    | ,6%    |
|             | NO | Recuento                  | 128           | 798    | 926    |
|             |    | % dentro de GDM DIAGNOSIS | 98,5%         | 99,5%  | 99,4%  |
| Total       |    | Recuento                  | 130           | 802    | 932    |
|             |    | % dentro de GDM DIAGNOSIS | 100,0%        | 100,0% | 100,0% |

**Pruebas de chi-cuadrado**

|                                         | Valor              | gl | Sig. asintótica (bilateral) | Sig. exacta (bilateral) | Sig. exacta (unilateral) |
|-----------------------------------------|--------------------|----|-----------------------------|-------------------------|--------------------------|
| Chi-cuadrado de Pearson                 | 1,891 <sup>a</sup> | 1  | ,169                        |                         |                          |
| Corrección por continuidad <sup>b</sup> | ,614               | 1  | ,433                        |                         |                          |
| Razón de verosimilitudes                | 1,455              | 1  | ,228                        |                         |                          |
| Estadístico exacto de Fisher            |                    |    |                             | ,199                    | ,199                     |
| Asociación lineal por lineal            | 1,889              | 1  | ,169                        |                         |                          |
| N de casos válidos                      | 932                |    |                             |                         |                          |

a. 1 casillas (25,0%) tienen una frecuencia esperada inferior a 5. La frecuencia mínima esperada es ,84.

b. Calculado sólo para una tabla de 2x2.

**Estimación de riesgo**

|                                                  | Valor | Intervalo de confianza al 95% |          |
|--------------------------------------------------|-------|-------------------------------|----------|
|                                                  |       | Inferior                      | Superior |
| Razón de las ventajas para PROTEINURIA (SI / NO) | 3,117 | ,565                          | 17,194   |

|                                       |       |      |       |
|---------------------------------------|-------|------|-------|
| Para la cohorte<br>GDM_DIAGNOSIS = SI | 2,411 | ,769 | 7,562 |
| Para la cohorte<br>GDM_DIAGNOSIS = NO | ,774  | ,439 | 1,363 |
| N de casos válidos                    | 932   |      |       |

**Tabla de contingencia**

|             |    |                              | GDM_DIAGNOSIS |        | Total  |
|-------------|----|------------------------------|---------------|--------|--------|
|             |    |                              | SI            | NO     |        |
| BACTERIURIA | SI | Recuento                     | 35            | 120    | 155    |
|             |    | % dentro de<br>GDM_DIAGNOSIS | 26,9%         | 15,0%  | 16,6%  |
|             | NO | Recuento                     | 95            | 682    | 777    |
|             |    | % dentro de<br>GDM_DIAGNOSIS | 73,1%         | 85,0%  | 83,4%  |
| Total       |    | Recuento                     | 130           | 802    | 932    |
|             |    | % dentro de<br>GDM_DIAGNOSIS | 100,0%        | 100,0% | 100,0% |

**Pruebas de chi-cuadrado**

|                                         | Valor               | gl | Sig. asintótica<br>(bilateral) | Sig. exacta<br>(bilateral) | Sig. exacta<br>(unilateral) |
|-----------------------------------------|---------------------|----|--------------------------------|----------------------------|-----------------------------|
| Chi-cuadrado de Pearson                 | 11,542 <sup>a</sup> | 1  | ,001                           |                            |                             |
| Corrección por continuidad <sup>b</sup> | 10,695              | 1  | ,001                           |                            |                             |
| Razón de verosimilitudes                | 10,341              | 1  | ,001                           |                            |                             |
| Estadístico exacto de Fisher            |                     |    |                                | ,001                       | ,001                        |
| Asociación lineal por lineal            | 11,530              | 1  | ,001                           |                            |                             |
| N de casos válidos                      | 932                 |    |                                |                            |                             |

a. 0 casillas (,0%) tienen una frecuencia esperada inferior a 5. La frecuencia mínima esperada es 21,62.

b. Calculado sólo para una tabla de 2x2.



**Estimación de riesgo**

|                                                  | Valor | Intervalo de confianza al 95% |          |
|--------------------------------------------------|-------|-------------------------------|----------|
|                                                  |       | Inferior                      | Superior |
| Razón de las ventajas para BACTERIURIA (SI / NO) | 2,094 | 1,357                         | 3,230    |
| Para la cohorte                                  | 1,847 | 1,305                         | 2,613    |
| GDM_DIAGNOSIS = SI                               |       |                               |          |
| Para la cohorte                                  | ,882  | ,807                          | ,964     |
| GDM_DIAGNOSIS = NO                               |       |                               |          |
| N de casos válidos                               | 932   |                               |          |

**Tabla de contingencia**

|       |    |                           | GDM_DIAGNOSIS |        | Total  |
|-------|----|---------------------------|---------------|--------|--------|
|       |    |                           | SI            | NO     |        |
| UTI   | SI | Recuento                  | 7             | 31     | 38     |
|       |    | % dentro de GDM_DIAGNOSIS | 5,4%          | 3,9%   | 4,1%   |
|       | NO | Recuento                  | 123           | 771    | 894    |
|       |    | % dentro de GDM_DIAGNOSIS | 94,6%         | 96,1%  | 95,9%  |
| Total |    | Recuento                  | 130           | 802    | 932    |
|       |    | % dentro de GDM_DIAGNOSIS | 100,0%        | 100,0% | 100,0% |

**Pruebas de chi-cuadrado**

|                                         | Valor             | gl | Sig. asintótica (bilateral) | Sig. exacta (bilateral) | Sig. exacta (unilateral) |
|-----------------------------------------|-------------------|----|-----------------------------|-------------------------|--------------------------|
| Chi-cuadrado de Pearson                 | ,660 <sup>a</sup> | 1  | ,416                        |                         |                          |
| Corrección por continuidad <sup>b</sup> | ,329              | 1  | ,566                        |                         |                          |
| Razón de verosimilitudes                | ,612              | 1  | ,434                        |                         |                          |

|                              |      |   |      |      |      |
|------------------------------|------|---|------|------|------|
| Estadístico exacto de Fisher |      |   |      | ,470 | ,271 |
| Asociación lineal por lineal | ,660 | 1 | ,417 |      |      |
| N de casos válidos           | 932  |   |      |      |      |

- a. 0 casillas (,0%) tienen una frecuencia esperada inferior a 5. La frecuencia mínima esperada es 5,30.  
b. Calculado sólo para una tabla de 2x2.

#### Estimación de riesgo

|                                          | Valor | Intervalo de confianza al 95% |          |
|------------------------------------------|-------|-------------------------------|----------|
|                                          |       | Inferior                      | Superior |
| Razón de las ventajas para UTI (SI / NO) | 1,415 | ,610                          | 3,285    |
| Para la cohorte GDM_DIAGNOSIS = SI       | 1,339 | ,672                          | 2,667    |
| Para la cohorte GDM_DIAGNOSIS = NO       | ,946  | ,811                          | 1,103    |
| N de casos válidos                       | 932   |                               |          |

#### Tabla de contingencia

|                   |                           |        | GDM_DIAGNOSIS |        | Total |
|-------------------|---------------------------|--------|---------------|--------|-------|
|                   |                           |        | SI            | NO     |       |
| DELIVERY EUTOCICO | Recuento                  | 76     | 503           | 579    |       |
|                   | % dentro de GDM_DIAGNOSIS | 58,5%  | 62,7%         | 62,1%  |       |
|                   |                           |        |               |        |       |
| INSTRUMENTAL      | Recuento                  | 30     | 129           | 159    |       |
|                   | % dentro de GDM_DIAGNOSIS | 23,1%  | 16,1%         | 17,1%  |       |
|                   |                           |        |               |        |       |
| CESAREA           | Recuento                  | 24     | 170           | 194    |       |
|                   | % dentro de GDM_DIAGNOSIS | 18,5%  | 21,2%         | 20,8%  |       |
|                   |                           |        |               |        |       |
| Total             | Recuento                  | 130    | 802           | 932    |       |
|                   | % dentro de GDM_DIAGNOSIS | 100,0% | 100,0%        | 100,0% |       |
|                   |                           |        |               |        |       |

**Pruebas de chi-cuadrado**

|                              | Valor              | gl | Sig. asintótica<br>(bilateral) |
|------------------------------|--------------------|----|--------------------------------|
| Chi-cuadrado de Pearson      | 3,934 <sup>a</sup> | 2  | ,140                           |
| Razón de verosimilitudes     | 3,685              | 2  | ,158                           |
| Asociación lineal por lineal | ,039               | 1  | ,843                           |
| N de casos válidos           | 932                |    |                                |

a. 0 casillas (,0%) tienen una frecuencia esperada inferior a 5. La frecuencia mínima esperada es 22,18.

**Tabla de contingencia**

|              |                                         |                                          | GDM_DIAGNOSIS |             | Total       |
|--------------|-----------------------------------------|------------------------------------------|---------------|-------------|-------------|
|              |                                         |                                          | SI            | NO          |             |
| EMERGENCY_CS | C. ELECTIVA PRIMER PARTO NALGAS         | Recuento<br>% dentro de<br>GDM_DIAGNOSIS | 4<br>18,2%    | 25<br>15,3% | 29<br>15,7% |
|              | C. ELECTIVA PLACENT PREVIA              | Recuento<br>% dentro de<br>GDM_DIAGNOSIS | 1<br>4,5%     | 7<br>4,3%   | 8<br>4,3%   |
|              | C. ELECTIVA 2 CESAREAS PREVIAS          | Recuento<br>% dentro de<br>GDM_DIAGNOSIS | 0<br>,0%      | 6<br>3,7%   | 6<br>3,2%   |
|              | C. ELECTIVA MIOMA                       | Recuento<br>% dentro de<br>GDM_DIAGNOSIS | 0<br>,0%      | 1<br>,6%    | 1<br>,5%    |
|              | C. ELECTIVA CRONOLOGICAMENTE PROLONGADA | Recuento<br>% dentro de<br>GDM_DIAGNOSIS | 6<br>27,3%    | 28<br>17,2% | 34<br>18,4% |
|              | C. ELECTIVA INTERES                     | Recuento                                 | 6             | 39          | 45          |

|                                        |                              |        |        |        |
|----------------------------------------|------------------------------|--------|--------|--------|
| MATERNO                                | % dentro de<br>GDM_DIAGNOSIS | 27,3%  | 23,9%  | 24,3%  |
| C. ELECTIVA OTRAS                      | Recuento                     | 2      | 35     | 37     |
|                                        | % dentro de<br>GDM_DIAGNOSIS | 9,1%   | 21,5%  | 20,0%  |
| C. URGENTE<br>SUFRIMIENTO FETAL        | Recuento                     | 1      | 1      | 2      |
|                                        | % dentro de<br>GDM_DIAGNOSIS | 4,5%   | ,6%    | 1,1%   |
| C. URGENTE<br>DESPROPORCION<br>PELVICA | Recuento                     | 0      | 1      | 1      |
|                                        | % dentro de<br>GDM_DIAGNOSIS | ,0%    | ,6%    | ,5%    |
| C. URGENTE ROTURA<br>UTERINA           | Recuento                     | 2      | 19     | 21     |
|                                        | % dentro de<br>GDM_DIAGNOSIS | 9,1%   | 11,7%  | 11,4%  |
| C. URGENTE NO<br>PROGRESION            | Recuento                     | 0      | 1      | 1      |
|                                        | % dentro de<br>GDM_DIAGNOSIS | ,0%    | ,6%    | ,5%    |
| Total                                  | Recuento                     | 22     | 163    | 185    |
|                                        | % dentro de<br>GDM_DIAGNOSIS | 100,0% | 100,0% | 100,0% |

#### Pruebas de chi-cuadrado

|                              | Valor              | gl | Sig. asintótica<br>(bilateral) |
|------------------------------|--------------------|----|--------------------------------|
| Chi-cuadrado de Pearson      | 6,852 <sup>a</sup> | 10 | ,739                           |
| Razón de verosimilitudes     | 7,095              | 10 | ,716                           |
| Asociación lineal por lineal | ,309               | 1  | ,579                           |
| N de casos válidos           | 185                |    |                                |

**Pruebas de chi-cuadrado**

|                              | Valor              | gl | Sig. asintótica<br>(bilateral) |
|------------------------------|--------------------|----|--------------------------------|
| Chi-cuadrado de Pearson      | 6,852 <sup>a</sup> | 10 | ,739                           |
| Razón de verosimilitudes     | 7,095              | 10 | ,716                           |
| Asociación lineal por lineal | ,309               | 1  | ,579                           |
| N de casos válidos           | 185                |    |                                |

a. 14 casillas (63,6%) tienen una frecuencia esperada inferior a 5. La frecuencia mínima esperada es ,12.

**Estimación de riesgo**

|                                                       | Valor | Intervalo de confianza al 95% |          |
|-------------------------------------------------------|-------|-------------------------------|----------|
|                                                       |       | Inferior                      | Superior |
| Razón de las ventajas para cesareasi_no (1,00 / 2,00) | ,842  | ,524                          | 1,353    |
| Para la cohorte<br>GDM_DIAGNOSIS = SI                 | ,861  | ,569                          | 1,303    |
| Para la cohorte<br>GDM_DIAGNOSIS = NO                 | 1,023 | ,963                          | 1,087    |
| N de casos válidos                                    | 932   |                               |          |

**Tabla de contingencia**

|                  |    |                              | GDM_DIAGNOSIS |       | Total |
|------------------|----|------------------------------|---------------|-------|-------|
|                  |    |                              | SI            | NO    |       |
| INDUCTION_YesNon | SI | Recuento                     | 78            | 490   | 568   |
|                  |    | % dentro de<br>GDM_DIAGNOSIS | 60,0%         | 61,1% | 60,9% |
|                  | NO | Recuento                     | 52            | 312   | 364   |
|                  |    | % dentro de<br>GDM_DIAGNOSIS | 40,0%         | 38,9% | 39,1% |

|       |               |        |        |        |
|-------|---------------|--------|--------|--------|
| Total | Recuento      | 130    | 802    | 932    |
|       | % dentro de   | 100,0% | 100,0% | 100,0% |
|       | GDM_DIAGNOSIS |        |        |        |

#### Pruebas de chi-cuadrado

|                                         | Valor             | gl | Sig. asintótica<br>(bilateral) | Sig. exacta<br>(bilateral) | Sig. exacta<br>(unilateral) |
|-----------------------------------------|-------------------|----|--------------------------------|----------------------------|-----------------------------|
| Chi-cuadrado de Pearson                 | ,057 <sup>a</sup> | 1  | ,812                           |                            |                             |
| Corrección por continuidad <sup>b</sup> | ,020              | 1  | ,888                           |                            |                             |
| Razón de verosimilitudes                | ,056              | 1  | ,812                           |                            |                             |
| Estadístico exacto de Fisher            |                   |    |                                | ,847                       | ,442                        |
| Asociación lineal por lineal            | ,057              | 1  | ,812                           |                            |                             |
| N de casos válidos                      | 932               |    |                                |                            |                             |

a. 0 casillas (,0%) tienen una frecuencia esperada inferior a 5. La frecuencia mínima esperada es 50,77.

b. Calculado sólo para una tabla de 2x2.

#### Estimación de riesgo

|                                                             | Valor | Intervalo de confianza al 95% |          |
|-------------------------------------------------------------|-------|-------------------------------|----------|
|                                                             |       | Inferior                      | Superior |
| Razón de las ventajas para<br>INDUCTION_YesNon (SI /<br>NO) | ,955  | ,654                          | 1,395    |
| Para la cohorte<br>GDM_DIAGNOSIS = SI                       | ,961  | ,694                          | 1,331    |
| Para la cohorte<br>GDM_DIAGNOSIS = NO                       | 1,006 | ,954                          | 1,062    |
| N de casos válidos                                          | 932   |                               |          |

#### Tabla de contingencia

|  | GDM_DIAGNOSIS |    | Total |
|--|---------------|----|-------|
|  | SI            | NO |       |
|  |               |    |       |

|                |    |                              |        |        |        |
|----------------|----|------------------------------|--------|--------|--------|
| ANALGESIA_SINO | SI | Recuento                     | 106    | 661    | 767    |
|                |    | % dentro de<br>GDM_DIAGNOSIS | 81,5%  | 82,4%  | 82,3%  |
|                | NO | Recuento                     | 24     | 141    | 165    |
|                |    | % dentro de<br>GDM_DIAGNOSIS | 18,5%  | 17,6%  | 17,7%  |
| Total          |    | Recuento                     | 130    | 802    | 932    |
|                |    | % dentro de<br>GDM_DIAGNOSIS | 100,0% | 100,0% | 100,0% |

#### Pruebas de chi-cuadrado

|                                         | Valor             | gl | Sig. asintótica<br>(bilateral) | Sig. exacta<br>(bilateral) | Sig. exacta<br>(unilateral) |
|-----------------------------------------|-------------------|----|--------------------------------|----------------------------|-----------------------------|
| Chi-cuadrado de Pearson                 | ,060 <sup>a</sup> | 1  | ,807                           |                            |                             |
| Corrección por continuidad <sup>b</sup> | ,014              | 1  | ,904                           |                            |                             |
| Razón de verosimilitudes                | ,059              | 1  | ,808                           |                            |                             |
| Estadístico exacto de Fisher            |                   |    |                                | ,805                       | ,445                        |
| Asociación lineal por lineal            | ,059              | 1  | ,807                           |                            |                             |
| N de casos válidos                      | 932               |    |                                |                            |                             |

a. 0 casillas (,0%) tienen una frecuencia esperada inferior a 5. La frecuencia mínima esperada es 23,02.

b. Calculado sólo para una tabla de 2x2.

#### Estimación de riesgo

|                                                           | Valor | Intervalo de confianza al 95% |          |
|-----------------------------------------------------------|-------|-------------------------------|----------|
|                                                           |       | Inferior                      | Superior |
| Razón de las ventajas para<br>ANALGESIA_SINO (SI /<br>NO) | ,942  | ,584                          | 1,521    |
| Para la cohorte<br>GDM_DIAGNOSIS = SI                     | ,950  | ,631                          | 1,432    |
| Para la cohorte<br>GDM_DIAGNOSIS = NO                     | 1,008 | ,941                          | 1,081    |

**Estimación de riesgo**

|                                                     | Valor | Intervalo de confianza al 95% |          |
|-----------------------------------------------------|-------|-------------------------------|----------|
|                                                     |       | Inferior                      | Superior |
| Razón de las ventajas para ANALGESIA_SINO (SI / NO) | ,942  | ,584                          | 1,521    |
| Para la cohorte GDM_DIAGNOSIS = SI                  | ,950  | ,631                          | 1,432    |
| Para la cohorte GDM_DIAGNOSIS = NO                  | 1,008 | ,941                          | 1,081    |
| N de casos válidos                                  | 932   |                               |          |

**Tabla de contingencia**

|                |    |                           | GDM_DIAGNOSIS |        | Total  |
|----------------|----|---------------------------|---------------|--------|--------|
|                |    |                           | SI            | NO     |        |
| EPISOTOMY_SINO | SI | Recuento                  | 43            | 256    | 299    |
|                |    | % dentro de GDM_DIAGNOSIS | 33,1%         | 31,9%  | 32,1%  |
|                | NO | Recuento                  | 87            | 546    | 633    |
|                |    | % dentro de GDM_DIAGNOSIS | 66,9%         | 68,1%  | 67,9%  |
| Total          |    | Recuento                  | 130           | 802    | 932    |
|                |    | % dentro de GDM_DIAGNOSIS | 100,0%        | 100,0% | 100,0% |

**Pruebas de chi-cuadrado**

|                                         | Valor             | gl | Sig. asintótica (bilateral) | Sig. exacta (bilateral) | Sig. exacta (unilateral) |
|-----------------------------------------|-------------------|----|-----------------------------|-------------------------|--------------------------|
| Chi-cuadrado de Pearson                 | ,069 <sup>a</sup> | 1  | ,793                        |                         |                          |
| Corrección por continuidad <sup>b</sup> | ,026              | 1  | ,872                        |                         |                          |
| Razón de verosimilitudes                | ,068              | 1  | ,794                        |                         |                          |



|                              |      |   |      |      |      |
|------------------------------|------|---|------|------|------|
| Estadístico exacto de Fisher |      |   |      | ,840 | ,433 |
| Asociación lineal por lineal | ,069 | 1 | ,793 |      |      |
| N de casos válidos           | 932  |   |      |      |      |

a. 0 casillas (,0%) tienen una frecuencia esperada inferior a 5. La frecuencia mínima esperada es 41,71.

b. Calculado sólo para una tabla de 2x2.

#### Estimación de riesgo

|                                                     | Valor | Intervalo de confianza al 95% |          |
|-----------------------------------------------------|-------|-------------------------------|----------|
|                                                     |       | Inferior                      | Superior |
| Razón de las ventajas para EPISOTOMY_SINO (SI / NO) | 1,054 | ,711                          | 1,564    |
| Para la cohorte GDM_DIAGNOSIS = SI                  | 1,046 | ,746                          | 1,468    |
| Para la cohorte GDM_DIAGNOSIS = NO                  | ,993  | ,939                          | 1,050    |
| N de casos válidos                                  | 932   |                               |          |

#### Tabla de contingencia

|                     |    |                           | GDM_DIAGNOSIS |       | Total |
|---------------------|----|---------------------------|---------------|-------|-------|
|                     |    |                           | SI            | NO    |       |
| PERINEAL_TRAUMA_Y_N | SI | Recuento                  | 36            | 265   | 301   |
|                     |    | % dentro de GDM_DIAGNOSIS | 27,7%         | 33,0% | 32,3% |
|                     | NO | Recuento                  | 94            | 537   | 631   |
|                     |    | % dentro de GDM_DIAGNOSIS | 72,3%         | 67,0% | 67,7% |
| Total               |    | Recuento                  | 130           | 802   | 932   |

**Tabla de contingencia**

|                     |    |                              | GDM_DIAGNOSIS |        | Total  |
|---------------------|----|------------------------------|---------------|--------|--------|
|                     |    |                              | SI            | NO     |        |
| PERINEAL_TRAUMA_Y_N | SI | Recuento                     | 36            | 265    | 301    |
|                     |    | % dentro de<br>GDM_DIAGNOSIS | 27,7%         | 33,0%  | 32,3%  |
|                     | NO | Recuento                     | 94            | 537    | 631    |
|                     |    | % dentro de<br>GDM_DIAGNOSIS | 72,3%         | 67,0%  | 67,7%  |
| Total               |    | Recuento                     | 130           | 802    | 932    |
|                     |    | % dentro de<br>GDM_DIAGNOSIS | 100,0%        | 100,0% | 100,0% |

**Pruebas de chi-cuadrado**

|                                         | Valor              | gl | Sig. asintótica<br>(bilateral) | Sig. exacta<br>(bilateral) | Sig. exacta<br>(unilateral) |
|-----------------------------------------|--------------------|----|--------------------------------|----------------------------|-----------------------------|
| Chi-cuadrado de Pearson                 | 1,464 <sup>a</sup> | 1  | ,226                           |                            |                             |
| Corrección por continuidad <sup>b</sup> | 1,230              | 1  | ,267                           |                            |                             |
| Razón de verosimilitudes                | 1,498              | 1  | ,221                           |                            |                             |
| Estadístico exacto de Fisher            |                    |    |                                | ,266                       | ,133                        |
| Asociación lineal por lineal            | 1,463              | 1  | ,226                           |                            |                             |
| N de casos válidos                      | 932                |    |                                |                            |                             |

a. 0 casillas (,0%) tienen una frecuencia esperada inferior a 5. La frecuencia mínima esperada es 41,98.

b. Calculado sólo para una tabla de 2x2.

**Estimación de riesgo**

|  | Valor | Intervalo de confianza al 95% |          |
|--|-------|-------------------------------|----------|
|  |       | Inferior                      | Superior |
|  |       |                               |          |

|                                                          |       |      |       |
|----------------------------------------------------------|-------|------|-------|
| Razón de las ventajas para PERINEAL_TRAUMA_Y_N (SI / NO) | ,776  | ,514 | 1,171 |
| Para la cohorte GDM_DIAGNOSIS = SI                       | ,803  | ,561 | 1,149 |
| Para la cohorte GDM_DIAGNOSIS = NO                       | 1,035 | ,981 | 1,091 |
| N de casos válidos                                       | 932   |      |       |

**Tabla de contingencia**

|                |      |                           | GDM_DIAGNOSIS |        | Total  |
|----------------|------|---------------------------|---------------|--------|--------|
|                |      |                           | SI            | NO     |        |
| PREMATURITY_37 | 1,00 | Recuento                  | 7             | 46     | 53     |
|                |      | % dentro de GDM_DIAGNOSIS | 5,4%          | 5,7%   | 5,7%   |
|                | 2,00 | Recuento                  | 123           | 756    | 879    |
|                |      | % dentro de GDM_DIAGNOSIS | 94,6%         | 94,3%  | 94,3%  |
| Total          |      | Recuento                  | 130           | 802    | 932    |
|                |      | % dentro de GDM_DIAGNOSIS | 100,0%        | 100,0% | 100,0% |

**Pruebas de chi-cuadrado**

|                                         | Valor             | gl | Sig. asintótica (bilateral) | Sig. exacta (bilateral) | Sig. exacta (unilateral) |
|-----------------------------------------|-------------------|----|-----------------------------|-------------------------|--------------------------|
| Chi-cuadrado de Pearson                 | ,026 <sup>a</sup> | 1  | ,873                        |                         |                          |
| Corrección por continuidad <sup>b</sup> | ,000              | 1  | 1,000                       |                         |                          |
| Razón de verosimilitudes                | ,026              | 1  | ,872                        |                         |                          |
| Estadístico exacto de Fisher            |                   |    |                             | 1,000                   | ,535                     |
| Asociación lineal por lineal            | ,026              | 1  | ,873                        |                         |                          |
| N de casos válidos                      | 932               |    |                             |                         |                          |

**Pruebas de chi-cuadrado**

|                                         | Valor             | gl | Sig. asintótica<br>(bilateral) | Sig. exacta<br>(bilateral) | Sig. exacta<br>(unilateral) |
|-----------------------------------------|-------------------|----|--------------------------------|----------------------------|-----------------------------|
| Chi-cuadrado de Pearson                 | ,026 <sup>a</sup> | 1  | ,873                           |                            |                             |
| Corrección por continuidad <sup>b</sup> | ,000              | 1  | 1,000                          |                            |                             |
| Razón de verosimilitudes                | ,026              | 1  | ,872                           |                            |                             |
| Estadístico exacto de Fisher            |                   |    |                                | 1,000                      | ,535                        |
| Asociación lineal por lineal            | ,026              | 1  | ,873                           |                            |                             |
| N de casos válidos                      | 932               |    |                                |                            |                             |

a. 0 casillas (,0%) tienen una frecuencia esperada inferior a 5. La frecuencia mínima esperada es 7,39.

b. Calculado sólo para una tabla de 2x2.

**Estimación de riesgo**

|                                                               | Valor | Intervalo de confianza al 95% |          |
|---------------------------------------------------------------|-------|-------------------------------|----------|
|                                                               |       | Inferior                      | Superior |
| Razón de las ventajas para<br>PREMATURITY_37 (1,00 /<br>2,00) | ,935  | ,413                          | 2,119    |
| Para la cohorte<br>GDM_DIAGNOSIS = SI                         | ,944  | ,464                          | 1,919    |
| Para la cohorte<br>GDM_DIAGNOSIS = NO                         | 1,009 | ,906                          | 1,125    |
| N de casos válidos                                            | 932   |                               |          |

**Tabla de contingencia**

|               |      |                              | GDM DIAGNOSIS |      | Total |
|---------------|------|------------------------------|---------------|------|-------|
|               |      |                              | SI            | NO   |       |
| LGA_4000_4500 | 1,00 | Recuento                     | 1             | 31   | 32    |
|               |      | % dentro de<br>GDM_DIAGNOSIS | ,8%           | 3,9% | 3,4%  |
|               | 2,00 | Recuento                     | 129           | 771  | 900   |

|       |                              |        |        |        |
|-------|------------------------------|--------|--------|--------|
|       | % dentro de<br>GDM_DIAGNOSIS | 99,2%  | 96,1%  | 96,6%  |
| Total | Recuento                     | 130    | 802    | 932    |
|       | % dentro de<br>GDM_DIAGNOSIS | 100,0% | 100,0% | 100,0% |

#### Pruebas de chi-cuadrado

|                                         | Valor              | gl | Sig. asintótica<br>(bilateral) | Sig. exacta<br>(bilateral) | Sig. exacta<br>(unilateral) |
|-----------------------------------------|--------------------|----|--------------------------------|----------------------------|-----------------------------|
| Chi-cuadrado de Pearson                 | 3,234 <sup>a</sup> | 1  | ,072                           |                            |                             |
| Corrección por continuidad <sup>b</sup> | 2,368              | 1  | ,124                           |                            |                             |
| Razón de verosimilitudes                | 4,464              | 1  | ,035                           |                            |                             |
| Estadístico exacto de Fisher            |                    |    |                                | ,113                       | ,048                        |
| Asociación lineal por lineal            | 3,231              | 1  | ,072                           |                            |                             |
| N de casos válidos                      | 932                |    |                                |                            |                             |

a. 1 casillas (25,0%) tienen una frecuencia esperada inferior a 5. La frecuencia mínima esperada es 4,46.

b. Calculado sólo para una tabla de 2x2.

#### Estimación de riesgo

|                                                              | Valor | Intervalo de confianza al 95% |          |
|--------------------------------------------------------------|-------|-------------------------------|----------|
|                                                              |       | Inferior                      | Superior |
| Razón de las ventajas para<br>LGA_4000_4500 (1,00 /<br>2,00) | ,193  | ,026                          | 1,425    |
| Para la cohorte<br>GDM_DIAGNOSIS = SI                        | ,218  | ,031                          | 1,511    |
| Para la cohorte<br>GDM_DIAGNOSIS = NO                        | 1,131 | 1,057                         | 1,210    |
| N de casos válidos                                           | 932   |                               |          |

**Tabla de contingencia**

|               |      |                           | GDM_DIAGNOSIS |        | Total  |
|---------------|------|---------------------------|---------------|--------|--------|
|               |      |                           | SI            | NO     |        |
| SGA_2000_2500 | 1,00 | Recuento                  | 5             | 30     | 35     |
|               |      | % dentro de GDM_DIAGNOSIS | 3,8%          | 3,7%   | 3,8%   |
|               | 2,00 | Recuento                  | 125           | 772    | 897    |
|               |      | % dentro de GDM_DIAGNOSIS | 96,2%         | 96,3%  | 96,2%  |
| Total         |      | Recuento                  | 130           | 802    | 932    |
|               |      | % dentro de GDM_DIAGNOSIS | 100,0%        | 100,0% | 100,0% |

**Pruebas de chi-cuadrado**

|                                         | Valor             | gl | Sig. asintótica<br>(bilateral) | Sig. exacta<br>(bilateral) | Sig. exacta<br>(unilateral) |
|-----------------------------------------|-------------------|----|--------------------------------|----------------------------|-----------------------------|
| Chi-cuadrado de Pearson                 | ,003 <sup>a</sup> | 1  | ,953                           |                            |                             |
| Corrección por continuidad <sup>b</sup> | ,000              | 1  | 1,000                          |                            |                             |
| Razón de verosimilitudes                | ,003              | 1  | ,953                           |                            |                             |
| Estadístico exacto de Fisher            |                   |    |                                | 1,000                      | ,553                        |
| Asociación lineal por lineal            | ,003              | 1  | ,953                           |                            |                             |
| N de casos válidos                      | 932               |    |                                |                            |                             |

a. 1 casillas (25,0%) tienen una frecuencia esperada inferior a 5. La frecuencia mínima esperada es 4,88.

b. Calculado sólo para una tabla de 2x2.

**Estimación de riesgo**

|  | Valor | Intervalo de confianza al 95% |          |
|--|-------|-------------------------------|----------|
|  |       | Inferior                      | Superior |
|  |       |                               |          |

|                                                        |       |      |       |
|--------------------------------------------------------|-------|------|-------|
| Razón de las ventajas para SGA_2000_2500 (1,00 / 2,00) | 1,029 | ,392 | 2,703 |
| Para la cohorte GDM_DIAGNOSIS = SI                     | 1,025 | ,448 | 2,345 |
| Para la cohorte GDM_DIAGNOSIS = NO                     | ,996  | ,868 | 1,143 |
| N de casos válidos                                     | 932   |      |       |

**Tabla de contingencia**

|       |      |                           | GDM DIAGNOSIS |        | Total  |
|-------|------|---------------------------|---------------|--------|--------|
|       |      |                           | SI            | NO     |        |
| pH7.1 | 1,00 | Recuento                  | 6             | 19     | 25     |
|       |      | % dentro de GDM_DIAGNOSIS | 4,6%          | 2,4%   | 2,7%   |
|       | 2,00 | Recuento                  | 124           | 783    | 907    |
|       |      | % dentro de GDM_DIAGNOSIS | 95,4%         | 97,6%  | 97,3%  |
| Total |      | Recuento                  | 130           | 802    | 932    |
|       |      | % dentro de GDM_DIAGNOSIS | 100,0%        | 100,0% | 100,0% |

**Pruebas de chi-cuadrado**

|                                         | Valor              | gl | Sig. asintótica (bilateral) | Sig. exacta (bilateral) | Sig. exacta (unilateral) |
|-----------------------------------------|--------------------|----|-----------------------------|-------------------------|--------------------------|
| Chi-cuadrado de Pearson                 | 2,162 <sup>a</sup> | 1  | ,141                        |                         |                          |
| Corrección por continuidad <sup>b</sup> | 1,387              | 1  | ,239                        |                         |                          |
| Razón de verosimilitudes                | 1,850              | 1  | ,174                        |                         |                          |
| Estadístico exacto de Fisher            |                    |    |                             | ,144                    | ,122                     |
| Asociación lineal por lineal            | 2,160              | 1  | ,142                        |                         |                          |

|                    |     |  |  |  |
|--------------------|-----|--|--|--|
| N de casos válidos | 932 |  |  |  |
|--------------------|-----|--|--|--|

a. 1 casillas (25,0%) tienen una frecuencia esperada inferior a 5. La frecuencia mínima esperada es 3,49.

b. Calculado sólo para una tabla de 2x2.

### Estimación de riesgo

|                                                | Valor | Intervalo de confianza al 95% |          |
|------------------------------------------------|-------|-------------------------------|----------|
|                                                |       | Inferior                      | Superior |
| Razón de las ventajas para pH7.1 (1,00 / 2,00) | 1,994 | ,781                          | 5,090    |
| Para la cohorte GDM_DIAGNOSIS = SI             | 1,755 | ,858                          | 3,594    |
| Para la cohorte GDM_DIAGNOSIS = NO             | ,880  | ,705                          | 1,099    |
| N de casos válidos                             | 932   |                               |          |

### Tabla de contingencia

|              |      |                           | GDM_DIAGNOSIS |        | Total  |
|--------------|------|---------------------------|---------------|--------|--------|
|              |      |                           | SI            | NO     |        |
| Apgar_1min_5 | 1,00 | Recuento                  | 1             | 11     | 12     |
|              |      | % dentro de GDM_DIAGNOSIS | ,8%           | 1,4%   | 1,3%   |
|              | 2,00 | Recuento                  | 129           | 791    | 920    |
|              |      | % dentro de GDM_DIAGNOSIS | 99,2%         | 98,6%  | 98,7%  |
| Total        |      | Recuento                  | 130           | 802    | 932    |
|              |      | % dentro de GDM_DIAGNOSIS | 100,0%        | 100,0% | 100,0% |

### Pruebas de chi-cuadrado



|                                         | Valor             | gl | Sig. asintótica<br>(bilateral) | Sig. exacta<br>(bilateral) | Sig. exacta<br>(unilateral) |
|-----------------------------------------|-------------------|----|--------------------------------|----------------------------|-----------------------------|
| Chi-cuadrado de Pearson                 | ,319 <sup>a</sup> | 1  | ,572                           |                            |                             |
| Corrección por continuidad <sup>b</sup> | ,021              | 1  | ,884                           |                            |                             |
| Razón de verosimilitudes                | ,365              | 1  | ,546                           |                            |                             |
| Estadístico exacto de Fisher            |                   |    |                                | 1,000                      | ,484                        |
| Asociación lineal por lineal            | ,319              | 1  | ,572                           |                            |                             |
| N de casos válidos                      | 932               |    |                                |                            |                             |

a. 1 casillas (25,0%) tienen una frecuencia esperada inferior a 5. La frecuencia mínima esperada es 1,67.

b. Calculado sólo para una tabla de 2x2.

#### Estimación de riesgo

|                                                          | Valor | Intervalo de confianza al 95% |          |
|----------------------------------------------------------|-------|-------------------------------|----------|
|                                                          |       | Inferior                      | Superior |
| Razón de las ventajas para<br>Apgar_1min_5 (1,00 / 2,00) | ,557  | ,071                          | 4,354    |
| Para la cohorte<br>GDM_DIAGNOSIS = SI                    | ,594  | ,090                          | 3,908    |
| Para la cohorte<br>GDM_DIAGNOSIS = NO                    | 1,066 | ,897                          | 1,267    |
| N de casos válidos                                       | 932   |                               |          |

#### Tabla de contingencia

|              |      |                              | GDM DIAGNOSIS |       | Total |
|--------------|------|------------------------------|---------------|-------|-------|
|              |      |                              | SI            | NO    |       |
| Apgar_5min_7 | 1,00 | Recuento                     | 0             | 5     | 5     |
|              |      | % dentro de<br>GDM_DIAGNOSIS | ,0%           | ,6%   | ,5%   |
|              |      | <hr/>                        |               |       |       |
|              | 2,00 | Recuento                     | 130           | 797   | 927   |
|              |      | % dentro de<br>GDM_DIAGNOSIS | 100,0%        | 99,4% | 99,5% |

|       |                              |        |        |        |
|-------|------------------------------|--------|--------|--------|
| Total | Recuento                     | 130    | 802    | 932    |
|       | % dentro de<br>GDM_DIAGNOSIS | 100,0% | 100,0% | 100,0% |

**Pruebas de chi-cuadrado**

|                                         | Valor             | gl | Sig. asintótica<br>(bilateral) | Sig. exacta<br>(bilateral) | Sig. exacta<br>(unilateral) |
|-----------------------------------------|-------------------|----|--------------------------------|----------------------------|-----------------------------|
| Chi-cuadrado de Pearson                 | ,815 <sup>a</sup> | 1  | ,367                           |                            |                             |
| Corrección por continuidad <sup>b</sup> | ,065              | 1  | ,798                           |                            |                             |
| Razón de verosimilitudes                | 1,507             | 1  | ,220                           |                            |                             |
| Estadístico exacto de Fisher            |                   |    |                                | 1,000                      | ,471                        |
| Asociación lineal por lineal            | ,814              | 1  | ,367                           |                            |                             |
| N de casos válidos                      | 932               |    |                                |                            |                             |

a. 2 casillas (50,0%) tienen una frecuencia esperada inferior a 5. La frecuencia mínima esperada es ,70.

b. Calculado sólo para una tabla de 2x2.

**Tabla de contingencia**

|             |      |                              | GDM_DIAGNOSIS |        | Total  |
|-------------|------|------------------------------|---------------|--------|--------|
|             |      |                              | SI            | NO     |        |
| NICU_STANCE | 1,00 | Recuento                     | 0             | 9      | 9      |
|             |      | % dentro de<br>GDM_DIAGNOSIS | ,0%           | 1,1%   | 1,0%   |
|             | 2,00 | Recuento                     | 130           | 793    | 923    |
|             |      | % dentro de<br>GDM_DIAGNOSIS | 100,0%        | 98,9%  | 99,0%  |
| Total       |      | Recuento                     | 130           | 802    | 932    |
|             |      | % dentro de<br>GDM_DIAGNOSIS | 100,0%        | 100,0% | 100,0% |

**Pruebas de chi-cuadrado**

|                                         | Valor              | gl | Sig. asintótica<br>(bilateral) | Sig. exacta<br>(bilateral) | Sig. exacta<br>(unilateral) |
|-----------------------------------------|--------------------|----|--------------------------------|----------------------------|-----------------------------|
| Chi-cuadrado de Pearson                 | 1,473 <sup>a</sup> | 1  | ,225                           |                            |                             |
| Corrección por continuidad <sup>b</sup> | ,533               | 1  | ,465                           |                            |                             |
| Razón de verosimilitudes                | 2,718              | 1  | ,099                           |                            |                             |
| Estadístico exacto de Fisher            |                    |    |                                | ,621                       | ,257                        |
| Asociación lineal por lineal            | 1,471              | 1  | ,225                           |                            |                             |
| N de casos válidos                      | 932                |    |                                |                            |                             |

a. 1 casillas (25,0%) tienen una frecuencia esperada inferior a 5. La frecuencia mínima esperada es 1,26.

b. Calculado sólo para una tabla de 2x2.

**Tabla de contingencia**

|                    |      |                              | GDM DIAGNOSIS |        | Total  |
|--------------------|------|------------------------------|---------------|--------|--------|
|                    |      |                              | SI            | NO     |        |
| OBSERVATION_STANCE | 1,00 | Recuento                     | 2             | 17     | 19     |
|                    |      | % dentro de<br>GDM_DIAGNOSIS | 1,5%          | 2,1%   | 2,0%   |
|                    | 2,00 | Recuento                     | 128           | 785    | 913    |
|                    |      | % dentro de<br>GDM_DIAGNOSIS | 98,5%         | 97,9%  | 98,0%  |
| Total              |      | Recuento                     | 130           | 802    | 932    |
|                    |      | % dentro de<br>GDM_DIAGNOSIS | 100,0%        | 100,0% | 100,0% |

**Pruebas de chi-cuadrado**

|                                         | Valor             | gl | Sig. asintótica<br>(bilateral) | Sig. exacta<br>(bilateral) | Sig. exacta<br>(unilateral) |
|-----------------------------------------|-------------------|----|--------------------------------|----------------------------|-----------------------------|
| Chi-cuadrado de Pearson                 | ,189 <sup>a</sup> | 1  | ,664                           |                            |                             |
| Corrección por continuidad <sup>b</sup> | ,010              | 1  | ,920                           |                            |                             |
| Razón de verosimilitudes                | ,204              | 1  | ,652                           |                            |                             |
| Estadístico exacto de Fisher            |                   |    |                                | 1,000                      | ,492                        |

|                              |      |   |      |  |  |
|------------------------------|------|---|------|--|--|
| Asociación lineal por lineal | ,189 | 1 | ,664 |  |  |
| N de casos válidos           | 932  |   |      |  |  |

a. 1 casillas (25,0%) tienen una frecuencia esperada inferior a 5. La frecuencia mínima esperada es 2,65.

b. Calculado sólo para una tabla de 2x2.

#### Estimación de riesgo

|                                                                   | Valor | Intervalo de confianza al 95% |          |
|-------------------------------------------------------------------|-------|-------------------------------|----------|
|                                                                   |       | Inferior                      | Superior |
| Razón de las ventajas para<br>OBSERVATION_STANCE<br>(1,00 / 2,00) | ,722  | ,165                          | 3,160    |
| Para la cohorte<br>GDM_DIAGNOSIS = SI                             | ,751  | ,200                          | 2,813    |
| Para la cohorte<br>GDM_DIAGNOSIS = NO                             | 1,041 | ,890                          | 1,217    |
| N de casos válidos                                                | 932   |                               |          |

#### Tabla de contingencia

|              |    |                              | GDM_DIAGNOSIS |        | Total  |
|--------------|----|------------------------------|---------------|--------|--------|
|              |    |                              | SI            | NO     |        |
| HYPOGLYCEMIA | SI | Recuento                     | 1             | 7      | 8      |
|              |    | % dentro de<br>GDM_DIAGNOSIS | ,8%           | ,9%    | ,9%    |
|              | NO | Recuento                     | 129           | 795    | 924    |
|              |    | % dentro de<br>GDM_DIAGNOSIS | 99,2%         | 99,1%  | 99,1%  |
| Total        |    | Recuento                     | 130           | 802    | 932    |
|              |    | % dentro de<br>GDM_DIAGNOSIS | 100,0%        | 100,0% | 100,0% |

#### Pruebas de chi-cuadrado

|                                         | Valor             | gl | Sig. asintótica<br>(bilateral) | Sig. exacta<br>(bilateral) | Sig. exacta<br>(unilateral) |
|-----------------------------------------|-------------------|----|--------------------------------|----------------------------|-----------------------------|
| Chi-cuadrado de Pearson                 | ,014 <sup>a</sup> | 1  | ,905                           |                            |                             |
| Corrección por continuidad <sup>b</sup> | ,000              | 1  | 1,000                          |                            |                             |
| Razón de verosimilitudes                | ,015              | 1  | ,904                           |                            |                             |
| Estadístico exacto de Fisher            |                   |    |                                | 1,000                      | ,691                        |
| Asociación lineal por lineal            | ,014              | 1  | ,906                           |                            |                             |
| N de casos válidos                      | 932               |    |                                |                            |                             |

a. 1 casillas (25,0%) tienen una frecuencia esperada inferior a 5. La frecuencia mínima esperada es 1,12.

b. Calculado sólo para una tabla de 2x2.

#### Estimación de riesgo

|                                                      | Valor | Intervalo de confianza al 95% |          |
|------------------------------------------------------|-------|-------------------------------|----------|
|                                                      |       | Inferior                      | Superior |
| Razón de las ventajas para<br>HYPOGLYCEMIA (SI / NO) | ,880  | ,107                          | 7,215    |
| Para la cohorte<br>GDM_DIAGNOSIS = SI                | ,895  | ,142                          | 5,640    |
| Para la cohorte<br>GDM_DIAGNOSIS = NO                | 1,017 | ,782                          | 1,323    |
| N de casos válidos                                   | 932   |                               |          |

#### Tabla de contingencia

|                     |    |                              | GDM_DIAGNOSIS |       | Total |
|---------------------|----|------------------------------|---------------|-------|-------|
|                     |    |                              | SI            | NO    |       |
| RESPIRATORYDISTRESS | SI | Recuento                     | 0             | 8     | 8     |
|                     |    | % dentro de<br>GDM_DIAGNOSIS | ,0%           | 1,0%  | ,9%   |
|                     | NO | Recuento                     | 130           | 794   | 924   |
|                     |    | % dentro de<br>GDM_DIAGNOSIS | 100,0%        | 99,0% | 99,1% |

|       |                              |        |        |        |
|-------|------------------------------|--------|--------|--------|
| Total | Recuento                     | 130    | 802    | 932    |
|       | % dentro de<br>GDM_DIAGNOSIS | 100,0% | 100,0% | 100,0% |

### Pruebas de chi-cuadrado

|                                         | Valor              | gl | Sig. asintótica<br>(bilateral) | Sig. exacta<br>(bilateral) | Sig. exacta<br>(unilateral) |
|-----------------------------------------|--------------------|----|--------------------------------|----------------------------|-----------------------------|
| Chi-cuadrado de Pearson                 | 1,308 <sup>a</sup> | 1  | ,253                           |                            |                             |
| Corrección por continuidad <sup>b</sup> | ,398               | 1  | ,528                           |                            |                             |
| Razón de verosimilitudes                | 2,415              | 1  | ,120                           |                            |                             |
| Estadístico exacto de Fisher            |                    |    |                                | ,609                       | ,299                        |
| Asociación lineal por lineal            | 1,307              | 1  | ,253                           |                            |                             |
| N de casos válidos                      | 932                |    |                                |                            |                             |

a. 1 casillas (25,0%) tienen una frecuencia esperada inferior a 5. La frecuencia mínima esperada es 1,12.

b. Calculado sólo para una tabla de 2x2.

### Tabla de contingencia

|                       |    |                              | GDM_DIAGNOSIS |        | Total  |
|-----------------------|----|------------------------------|---------------|--------|--------|
|                       |    |                              | SI            | NO     |        |
| BRACHIALPLEXUS_INJURY | SI | Recuento                     | 0             | 1      | 1      |
|                       |    | % dentro de<br>GDM_DIAGNOSIS | ,0%           | ,1%    | ,1%    |
|                       | NO | Recuento                     | 130           | 801    | 931    |
|                       |    | % dentro de<br>GDM_DIAGNOSIS | 100,0%        | 99,9%  | 99,9%  |
| Total                 |    | Recuento                     | 130           | 802    | 932    |
|                       |    | % dentro de<br>GDM_DIAGNOSIS | 100,0%        | 100,0% | 100,0% |

**Pruebas de chi-cuadrado**

|                                         | Valor             | gl | Sig. asintótica<br>(bilateral) | Sig. exacta<br>(bilateral) | Sig. exacta<br>(unilateral) |
|-----------------------------------------|-------------------|----|--------------------------------|----------------------------|-----------------------------|
| Chi-cuadrado de Pearson                 | ,162 <sup>a</sup> | 1  | ,687                           |                            |                             |
| Corrección por continuidad <sup>b</sup> | ,000              | 1  | 1,000                          |                            |                             |
| Razón de verosimilitudes                | ,301              | 1  | ,583                           |                            |                             |
| Estadístico exacto de Fisher            |                   |    |                                | 1,000                      | ,861                        |
| Asociación lineal por lineal            | ,162              | 1  | ,687                           |                            |                             |
| N de casos válidos                      | 932               |    |                                |                            |                             |

a. 2 casillas (50,0%) tienen una frecuencia esperada inferior a 5. La frecuencia mínima esperada es ,14.

b. Calculado sólo para una tabla de 2x2.

**Tabla de contingencia**

|                     |    |                              | GDM_DIAGNOSIS |        | Total  |
|---------------------|----|------------------------------|---------------|--------|--------|
|                     |    |                              | SI            | NO     |        |
| HIPERBILIRRUBINEMIA | SI | Recuento                     | 1             | 14     | 15     |
|                     |    | % dentro de<br>GDM_DIAGNOSIS | ,8%           | 1,7%   | 1,6%   |
|                     | NO | Recuento                     | 129           | 788    | 917    |
|                     |    | % dentro de<br>GDM_DIAGNOSIS | 99,2%         | 98,3%  | 98,4%  |
| Total               |    | Recuento                     | 130           | 802    | 932    |
|                     |    | % dentro de<br>GDM_DIAGNOSIS | 100,0%        | 100,0% | 100,0% |

**Pruebas de chi-cuadrado**

|                                         | Valor             | gl | Sig. asintótica<br>(bilateral) | Sig. exacta<br>(bilateral) | Sig. exacta<br>(unilateral) |
|-----------------------------------------|-------------------|----|--------------------------------|----------------------------|-----------------------------|
| Chi-cuadrado de Pearson                 | ,673 <sup>a</sup> | 1  | ,412                           |                            |                             |
| Corrección por continuidad <sup>b</sup> | ,198              | 1  | ,656                           |                            |                             |

|                              |      |   |      |      |      |
|------------------------------|------|---|------|------|------|
| Razón de verosimilitudes     | ,809 | 1 | ,368 |      |      |
| Estadístico exacto de Fisher |      |   |      | ,708 | ,358 |
| Asociación lineal por lineal | ,673 | 1 | ,412 |      |      |
| N de casos válidos           | 932  |   |      |      |      |

a. 1 casillas (25,0%) tienen una frecuencia esperada inferior a 5. La frecuencia mínima esperada es 2,09.

b. Calculado sólo para una tabla de 2x2.

#### Estimación de riesgo

|                                                                | Valor | Intervalo de confianza al 95% |          |
|----------------------------------------------------------------|-------|-------------------------------|----------|
|                                                                |       | Inferior                      | Superior |
| Razón de las ventajas para<br>HIPERBILIRRUBINEMIA<br>(SI / NO) | ,436  | ,057                          | 3,346    |
| Para la cohorte<br>GDM_DIAGNOSIS = SI                          | ,474  | ,071                          | 3,169    |
| Para la cohorte<br>GDM_DIAGNOSIS = NO                          | 1,086 | ,946                          | 1,247    |
| N de casos válidos                                             | 932   |                               |          |

#### Tabla de contingencia

|                 |      |                              | LGA 4000 4500 |        | Total  |
|-----------------|------|------------------------------|---------------|--------|--------|
|                 |      |                              | 1,00          | 2,00   |        |
| EWG_VS_ADEQUATE | 1,00 | Recuento                     | 5             | 352    | 357    |
|                 |      | % dentro de<br>LGA_4000_4500 | 16,7%         | 48,0%  | 46,8%  |
|                 | 2,00 | Recuento                     | 25            | 381    | 406    |
|                 |      | % dentro de<br>LGA_4000_4500 | 83,3%         | 52,0%  | 53,2%  |
| Total           |      | Recuento                     | 30            | 733    | 763    |
|                 |      | % dentro de<br>LGA_4000_4500 | 100,0%        | 100,0% | 100,0% |



**Pruebas de chi-cuadrado**

|                                         | Valor               | gl | Sig. asintótica<br>(bilateral) | Sig. exacta<br>(bilateral) | Sig. exacta<br>(unilateral) |
|-----------------------------------------|---------------------|----|--------------------------------|----------------------------|-----------------------------|
| Chi-cuadrado de Pearson                 | 11,381 <sup>a</sup> | 1  | ,001                           |                            |                             |
| Corrección por continuidad <sup>b</sup> | 10,156              | 1  | ,001                           |                            |                             |
| Razón de verosimilitudes                | 12,554              | 1  | ,000                           |                            |                             |
| Estadístico exacto de Fisher            |                     |    |                                | ,001                       | ,000                        |
| Asociación lineal por lineal            | 11,366              | 1  | ,001                           |                            |                             |
| N de casos válidos                      | 763                 |    |                                |                            |                             |

a. 0 casillas (,0%) tienen una frecuencia esperada inferior a 5. La frecuencia mínima esperada es 14,04.

b. Calculado sólo para una tabla de 2x2.

**Estimación de riesgo**

|                                                                | Valor | Intervalo de confianza al 95% |          |
|----------------------------------------------------------------|-------|-------------------------------|----------|
|                                                                |       | Inferior                      | Superior |
| Razón de las ventajas para<br>EWG_VS_ADEQUATE<br>(1,00 / 2,00) | ,216  | ,082                          | ,572     |
| Para la cohorte<br>LGA_4000_4500 = 1,00                        | ,227  | ,088                          | ,588     |
| Para la cohorte<br>LGA_4000_4500 = 2,00                        | 1,051 | 1,022                         | 1,080    |
| N de casos válidos                                             | 763   |                               |          |

**Estadísticos de grupo**

| GDM_DIAGNOSIS |    | N  | Media | Desviación típ. | Error típ. de la<br>media |
|---------------|----|----|-------|-----------------|---------------------------|
| AGE           | SI | 70 | 35,17 | 4,260           | ,509                      |

|                                                                                |    |     |         |          |         |
|--------------------------------------------------------------------------------|----|-----|---------|----------|---------|
|                                                                                | NO | 314 | 32,71   | 4,876    | ,275    |
| kg                                                                             | SI | 70  | 60,9057 | 11,14206 | 1,33173 |
|                                                                                | NO | 312 | 59,5341 | 8,81650  | ,49914  |
| BMIPREGESTACIONAL                                                              | SI | 70  | 23,3257 | 4,18483  | ,50018  |
|                                                                                | NO | 311 | 22,3821 | 3,17434  | ,18000  |
| COMPUTE                                                                        | SI | 70  | 23,3257 | 4,18483  | ,50018  |
| BMIPREGESTACIONAL=P<br>esopregestacional /<br>(TALLA metros *<br>TALLA metros) | NO | 311 | 22,3821 | 3,17434  | ,18000  |
| COMPUTE                                                                        | SI | 65  | 9,9862  | 5,70895  | ,70811  |
| GananciaPesoSG38=PESO<br>_SG36 -<br>Pesopregestacional                         | NO | 262 | 12,5731 | 5,23514  | ,32343  |
| KILOGRAMOS                                                                     | SI | 48  | 63,5979 | 9,19737  | 1,32753 |
|                                                                                | NO | 220 | 64,2368 | 10,70558 | ,72177  |
| BMI_POSTPARTO                                                                  | SI | 48  | 24,5752 | 4,14392  | ,59812  |
|                                                                                | NO | 220 | 24,1571 | 4,03018  | ,27171  |
| COMPUTE                                                                        | SI | 48  | 1,1833  | 3,70838  | ,53526  |
| GANANCIASG12_POSTPA<br>RTO = PESOPostP -<br>PESO_SG12                          | NO | 218 | 3,4486  | 4,82374  | ,32671  |
| CM                                                                             | SI | 45  | 84,7800 | 8,61325  | 1,28399 |
|                                                                                | NO | 203 | 83,8808 | 9,07365  | ,63685  |
| SBP_AFTERDELIVERY12_<br>14W                                                    | SI | 44  | 110,65  | 11,895   | 1,793   |
|                                                                                | NO | 203 | 110,45  | 12,899   | ,905    |
| DBP_AFTERDELIVERY_12<br>_14w                                                   | SI | 44  | 73,68   | 9,557    | 1,441   |
|                                                                                | NO | 203 | 72,53   | 10,459   | ,734    |
| FBG_12WAFTERDELIVER<br>Y                                                       | SI | 70  | 85,96   | 7,569    | ,905    |
|                                                                                | NO | 314 | 84,26   | 7,632    | ,431    |
| HBA1C_12WsAFTERDELIV<br>ERY                                                    | SI | 67  | 5,330   | ,2505    | ,0306   |
|                                                                                | NO | 267 | 5,204   | ,2836    | ,0174   |
| COL_12WsAFTERDELIVE<br>RY                                                      | SI | 69  | 204,57  | 41,849   | 5,038   |
|                                                                                | NO | 312 | 194,60  | 38,214   | 2,163   |

|                       |    |     |          |          |          |
|-----------------------|----|-----|----------|----------|----------|
| HDL_12WsAFTERDELIVER  | SI | 17  | 67,8235  | 12,45108 | 3,01983  |
| Y                     | NO | 65  | 62,6154  | 15,27528 | 1,89467  |
| LDL_12WsAFTERDELIVER  | SI | 17  | 129,7059 | 44,11718 | 10,69999 |
| Y                     | NO | 65  | 120,1626 | 31,74704 | 3,93774  |
| TrRIG_12WsAFTERDELIVE | SI | 68  | 79,68    | 51,789   | 6,280    |
| RY                    | NO | 310 | 79,54    | 41,723   | 2,370    |
| APO_12WsAFTERDELIVE   | SI | 16  | 97,2063  | 28,27789 | 7,06947  |
| RY                    | NO | 49  | 89,4106  | 28,25813 | 4,03688  |
| INSULINA_12WsAFTERDE  | SI | 62  | 5,6013   | 3,95535  | ,50233   |
| LIVERY                | NO | 260 | 6,6378   | 5,63188  | ,34927   |
| HOMA_12WsAFTERDELIV   | SI | 47  | 1,6106   | 1,64240  | ,23957   |
| ERY                   | NO | 225 | 1,5801   | 1,33904  | ,08927   |
| TSH_12WsAFTERDELIVER  | SI | 70  | 2,1496   | 1,81392  | ,21681   |
| Y                     | NO | 300 | 2,1690   | 5,02487  | ,29011   |
| T4L_12WsAFTERDELIVER  | SI | 70  | 7,9851   | 1,22722  | ,14668   |
| Y                     | NO | 300 | 8,3153   | 3,28968  | ,18993   |
| PREG_NUTRITIONSORE    | SI | 66  | ,7576    | 3,01310  | ,37089   |
|                       | NO | 299 | ,6154    | 2,98698  | ,17274   |
| NUTRITION_SCORE_36G   | SI | 47  | 8,0851   | 2,99151  | ,43636   |
| W                     | NO | 209 | 3,7416   | 3,03509  | ,20994   |
| COMPUTE               | SI | 63  | 4,4603   | 1,40075  | ,17648   |

|                                      |     |        |         |        |
|--------------------------------------|-----|--------|---------|--------|
| SG12_MEDDIET_SCORE= NO               | 280 | 4,4357 | 1,69634 | ,10138 |
| SG12_ACEITEOLIVAMEDD<br>IET +        |     |        |         |        |
| SG12_MLACEITEDIA_MED<br>DIET +       |     |        |         |        |
| SG12_VERDURAS_MEDDI<br>ET +          |     |        |         |        |
| SG12_FRUTAS_MEDDIET<br>+             |     |        |         |        |
| SG12_CARNEPROCESAD<br>A_MEDDIET +    |     |        |         |        |
| SG12_MANTEQUILLA_ME<br>DDIET +       |     |        |         |        |
| SG12_BEBIDASAZUCARA<br>DAS_MEDDIET + |     |        |         |        |
| SG12_ALCOHOL_MEDDIE<br>T +           |     |        |         |        |
| SG12_LEGUMBRES_ME                    |     |        |         |        |
| <b>COMPUTE</b> SI                    | 33  | 7,8485 | 2,18119 | ,37970 |

|                                      |     |        |         |        |
|--------------------------------------|-----|--------|---------|--------|
| SG36_MEDDIET_SCORE= NO               | 135 | 5,3630 | 1,79388 | ,15439 |
| SG36_ACEITEOLIVAMEDD<br>IET +        |     |        |         |        |
| SG36_MLACEITEDIA_MED<br>DIET +       |     |        |         |        |
| SG36_VERDURAS_MEDDI<br>ET +          |     |        |         |        |
| SG36_FRUTAS_MEDDIET<br>+             |     |        |         |        |
| SG36_CARNEPROCESAD<br>A_MEDDIET +    |     |        |         |        |
| SG36_MANTEQUILLA_ME<br>DDIET +       |     |        |         |        |
| SG36_BEBIDASAZUCARA<br>DAS_MEDDIET + |     |        |         |        |
| SG36_ALCOHOL_MEDDIE<br>T +           |     |        |         |        |
| SG36_LEGUMBRES_ME                    |     |        |         |        |

**Prueba de muestras independientes**

|     |                                     | Prueba de Levene para la igualdad de varianzas |      | Prueba T para la igualdad de medias |         |                  |                      |                             |                                               |          |
|-----|-------------------------------------|------------------------------------------------|------|-------------------------------------|---------|------------------|----------------------|-----------------------------|-----------------------------------------------|----------|
|     |                                     | F                                              | Sig. | t                                   | gl      | Sig. (bilateral) | Diferencia de medias | Error típ. de la diferencia | 95% Intervalo de confianza para la diferencia |          |
|     |                                     |                                                |      |                                     |         |                  |                      |                             | Inferior                                      | Superior |
| AGE | Se han asumido varianzas iguales    | ,758                                           | ,385 | 3,909                               | 382     | ,000             | 2,464                | ,631                        | 1,225                                         | 3,7      |
|     | No se han asumido varianzas iguales |                                                |      | 4,258                               | 113,069 | ,000             | 2,464                | ,579                        | 1,318                                         | 3,6      |
| kg  | Se han asumido varianzas iguales    | ,722                                           | ,396 | 1,117                               | 380     | ,265             | 1,37158              | 1,22759                     | -1,04215                                      | 3,785    |
|     | No se han asumido varianzas iguales |                                                |      | ,964                                | 89,356  | ,337             | 1,37158              | 1,42220                     | -1,45414                                      | 4,197    |

|                                                                                         |                                     |       |      |        |        |      |          |         |          |        |
|-----------------------------------------------------------------------------------------|-------------------------------------|-------|------|--------|--------|------|----------|---------|----------|--------|
| BMIPREGESTACIONAL                                                                       | Se han asumido varianzas iguales    | 2,814 | ,094 | 2,110  | 379    | ,036 | ,94364   | ,44726  | ,06421   | 1,823  |
|                                                                                         | No se han asumido varianzas iguales |       |      | 1,775  | 87,702 | ,079 | ,94364   | ,53158  | -,11282  | 2,000  |
| COMPUTE<br>BMIPREGESTACIONAL=P<br>esopregestacional /<br>(TALLAmetros *<br>TALLAmetros) | Se han asumido varianzas iguales    | 2,814 | ,094 | 2,110  | 379    | ,036 | ,94364   | ,44726  | ,06421   | 1,823  |
|                                                                                         | No se han asumido varianzas iguales |       |      | 1,775  | 87,702 | ,079 | ,94364   | ,53158  | -,11282  | 2,000  |
| COMPUTE<br>GananciaPesoSG38=PESO<br>_SG36 -<br>Pesopregestacional                       | Se han asumido varianzas iguales    | ,616  | ,433 | -3,501 | 325    | ,001 | -2,58694 | ,73882  | -4,04041 | -1,133 |
|                                                                                         | No se han asumido varianzas iguales |       |      | -3,323 | 92,502 | ,001 | -2,58694 | ,77847  | -4,13294 | -1,040 |
| KILOGRAMOS                                                                              | Se han asumido varianzas iguales    | 1,542 | ,215 | -,384  | 266    | ,702 | -,63890  | 1,66555 | -3,91823 | 2,640  |
|                                                                                         | No se han asumido varianzas iguales |       |      | -,423  | 77,441 | ,674 | -,63890  | 1,51105 | -3,64752 | 2,369  |
| BMI_POSTPARTO                                                                           | Se han asumido varianzas iguales    | ,727  | ,394 | ,648   | 266    | ,518 | ,41808   | ,64528  | -,85242  | 1,688  |
|                                                                                         | No se han asumido varianzas iguales |       |      | ,636   | 67,781 | ,527 | ,41808   | ,65695  | -,89291  | 1,729  |
| COMPUTE<br>GANANCIASG12_POSTPA<br>RTO = PESOPostP -<br>PESO_SG12                        | Se han asumido varianzas iguales    | ,658  | ,418 | -3,059 | 264    | ,002 | -2,26529 | ,74056  | -3,72345 | -,807  |
|                                                                                         | No se han asumido varianzas iguales |       |      | -3,612 | 85,959 | ,001 | -2,26529 | ,62709  | -3,51191 | -1,018 |
| CM                                                                                      | Se han asumido varianzas iguales    | ,331  | ,565 | ,607   | 246    | ,545 | ,89921   | 1,48176 | -2,01934 | 3,817  |
|                                                                                         | No se han asumido varianzas iguales |       |      | ,627   | 67,423 | ,533 | ,89921   | 1,43325 | -1,96123 | 3,759  |
| SBP_AFTERDELIVERY12_<br>14W                                                             | Se han asumido varianzas iguales    | ,474  | ,492 | ,097   | 245    | ,923 | ,205     | 2,117   | -3,964   | 4,3    |
|                                                                                         | No se han asumido varianzas iguales |       |      | ,102   | 66,791 | ,919 | ,205     | 2,009   | -3,804   | 4,2    |

|                            |                                     |       |      |        |         |      |          |          |           |        |
|----------------------------|-------------------------------------|-------|------|--------|---------|------|----------|----------|-----------|--------|
| DBP_AFTERDELIVERY_14w      | Se han asumido varianzas iguales    | ,117  | ,733 | ,674   | 245     | ,501 | 1,155    | 1,714    | -2,221    | 4,5    |
|                            | No se han asumido varianzas iguales |       |      | ,714   | 67,259  | ,478 | 1,155    | 1,617    | -2,073    | 4,3    |
| FBG_12WATERDELIVERY        | Se han asumido varianzas iguales    | ,180  | ,672 | 1,684  | 382     | ,093 | 1,696    | 1,007    | -,284     | 3,6    |
|                            | No se han asumido varianzas iguales |       |      | 1,693  | 102,660 | ,094 | 1,696    | 1,002    | -,291     | 3,6    |
| HBA1C_12WsAFTERDELIVERY    | Se han asumido varianzas iguales    | ,542  | ,462 | 3,328  | 332     | ,001 | ,1261    | ,0379    | ,0516     | ,20    |
|                            | No se han asumido varianzas iguales |       |      | 3,585  | 112,417 | ,001 | ,1261    | ,0352    | ,0564     | ,19    |
| COL_12WsAFTERDELIVERY      | Se han asumido varianzas iguales    | 1,008 | ,316 | 1,927  | 379     | ,055 | 9,970    | 5,174    | -,203     | 20,1   |
|                            | No se han asumido varianzas iguales |       |      | 1,818  | 94,688  | ,072 | 9,970    | 5,483    | -,916     | 20,8   |
| HDL_12WsAFTERDELIVERY      | Se han asumido varianzas iguales    | ,023  | ,881 | 1,296  | 80      | ,199 | 5,20814  | 4,01909  | -2,79011  | 13,206 |
|                            | No se han asumido varianzas iguales |       |      | 1,461  | 29,917  | ,154 | 5,20814  | 3,56499  | -2,07338  | 12,489 |
| LDL_12WsAFTERDELIVERY      | Se han asumido varianzas iguales    | 2,903 | ,092 | 1,013  | 80      | ,314 | 9,54327  | 9,41916  | -9,20146  | 28,288 |
|                            | No se han asumido varianzas iguales |       |      | ,837   | 20,533  | ,412 | 9,54327  | 11,40156 | -14,20043 | 33,286 |
| TrIG_12WsAFTERDELIVERY     | Se han asumido varianzas iguales    | ,735  | ,392 | ,023   | 376     | ,981 | ,136     | 5,850    | -11,367   | 11,6   |
|                            | No se han asumido varianzas iguales |       |      | ,020   | 87,053  | ,984 | ,136     | 6,713    | -13,206   | 13,4   |
| APO_12WsAFTERDELIVERY      | Se han asumido varianzas iguales    | ,125  | ,725 | ,958   | 63      | ,342 | 7,79564  | 8,13794  | -8,46674  | 24,058 |
|                            | No se han asumido varianzas iguales |       |      | ,958   | 25,529  | ,347 | 7,79564  | 8,14087  | -8,95321  | 24,544 |
| INSULINA_12WsAFTERDELIVERY | Se han asumido varianzas iguales    | 2,693 | ,102 | -1,370 | 320     | ,172 | -1,03648 | ,75655   | -2,52492  | ,451   |

|                                |                                        |       |      |        |         |      |          |        |          |       |
|--------------------------------|----------------------------------------|-------|------|--------|---------|------|----------|--------|----------|-------|
|                                | No se han asumido<br>varianzas iguales |       |      | -1,694 | 127,235 | ,093 | -1,03648 | ,61182 | -2,24715 | ,174  |
| HOMA_12WsAFTERDELIVERY         | Se han asumido varianzas<br>iguales    | ,004  | ,952 | ,137   | 270     | ,892 | ,03055   | ,22379 | -,41004  | ,471  |
|                                | No se han asumido<br>varianzas iguales |       |      | ,119   | 59,426  | ,905 | ,03055   | ,25566 | -,48095  | ,542  |
| TSH_12WsAFTERDELIVERY          | Se han asumido varianzas<br>iguales    | ,088  | ,767 | -,032  | 368     | ,975 | -,01940  | ,61019 | -1,21929 | 1,180 |
|                                | No se han asumido<br>varianzas iguales |       |      | -,054  | 308,827 | ,957 | -,01940  | ,36217 | -,73204  | ,693  |
| T4L_12WsAFTERDELIVERY          | Se han asumido varianzas<br>iguales    | 2,013 | ,157 | -,826  | 368     | ,409 | -,33019  | ,39987 | -1,11651 | ,456  |
|                                | No se han asumido<br>varianzas iguales |       |      | -1,376 | 299,834 | ,170 | -,33019  | ,23998 | -,80244  | ,142  |
| PREG_NUTRITIONSCORE            | Se han asumido varianzas<br>iguales    | ,137  | ,711 | ,349   | 363     | ,727 | ,14219   | ,40687 | -,65792  | ,942  |
|                                | No se han asumido<br>varianzas iguales |       |      | ,348   | 95,281  | ,729 | ,14219   | ,40914 | -,67003  | ,954  |
| NUTRITION_SCORE_36GW           | Se han asumido varianzas<br>iguales    | ,245  | ,621 | 8,888  | 254     | ,000 | 4,34348  | ,48870 | 3,38105  | 5,305 |
|                                | No se han asumido<br>varianzas iguales |       |      | 8,970  | 68,944  | ,000 | 4,34348  | ,48423 | 3,37745  | 5,309 |
| COMPUTE<br>SG12_MEDDIET_SCORE= | Se han asumido varianzas<br>iguales    | 1,938 | ,165 | ,107   | 341     | ,915 | ,02460   | ,22960 | -,42701  | ,476  |
